## Mammary lineage dictates homologous recombination repair and PARP inhibitor vulnerability

1 **Authors:**

2 Hyeyeon Kim<sup>1,2</sup>, Alison E. Casey<sup>1</sup>, Luis Palomero<sup>3</sup>, Kazeera Aliar<sup>1</sup>, Mathepan

3 Mahendralingam<sup>1,2</sup>, Michael Parsons<sup>4</sup>, Swami Narala<sup>1</sup>, Francesca Mateo<sup>3</sup>, Stefan Hofer<sup>1</sup>, Paul D.

4 Waterhouse<sup>2</sup>, Thomas Kislinger<sup>1,2</sup>, Miquel A. Pujana<sup>3</sup>, Hal K. Berman<sup>1</sup>, Rama Khokha<sup>1,2\*</sup>

5

6 **Affiliations:**

7 <sup>1</sup>Princess Margaret Cancer Centre, University Health Network, Toronto, Ontario, Canada.

8 <sup>2</sup>Department of Medical Biophysics, University of Toronto, Toronto, Ontario, Canada.

9 <sup>3</sup>ProCURE, Catalan Institute of Oncology, Oncobell, Bellvitge Institute for Biomedical Research  
10 (IDIBELL), L'Hospitalet del Llobregat, 08908, Barcelona, Catalonia, Spain

11 <sup>4</sup>Lunenfeld-Tanenbaum Research Institute, Mount Sinai Hospital, Toronto, Ontario, Canada.

12

13

14

15 \*Correspondence should be sent to Rama Khokha (e-mail: [rama.khokha@utoronto.ca](mailto:rama.khokha@utoronto.ca);

16 [rama.khokha@uhnresearch.ca](mailto:rama.khokha@uhnresearch.ca)); Tel: +1 416-634-8773

## 1 **Abstract**

2 It has long been assumed that all normal cells have the same capacity to engage homologous  
3 recombination (HR) and non-homologous end joining (NHEJ) to repair DNA double-strand  
4 breaks (DSBs), a concept exploited for DNA-damaging chemotherapeutics. We show that  
5 mammary epithelial lineage dictates the DSB repair pathway choice. Primary mammary  
6 proteomes and DSB repair enumeration by  $\gamma$ -H2AX, Rad51 and DNA-PK $\epsilon$  foci reveal that  
7 NHEJ operates in all epithelial cells, but high-fidelity HR is restricted to the luminal lineage.  
8 This translates to divergent poly (ADP-ribose) polymerase inhibitor (PARPi) vulnerability of  
9 mammary epithelial progenitor activity in both mouse and human, irrespective of the *BRCA1/2*  
10 status. Proteome-defined lineage-specific signatures correlate to breast cancer subtypes and  
11 predict PARPi response of triple-negative human breast cancer xenografts. These intrinsically  
12 divergent HR characteristics of mammary cell types underpin a new strategy for identifying  
13 PARPi responders.

1 Breast cancer is a heterogenous disease with diverse molecular alterations, histopathological  
2 characteristics, response to treatment and patient survival. To understand cellular heterogeneity,  
3 early studies of global gene expression profiling of breast tumours have revealed at least five  
4 different molecular subtypes (Luminal A, Luminal B, HER2+, Basal-like and Claudin-low)<sup>1,2</sup>,  
5 which improved the predictions of prognosis and chemotherapy responses in patients<sup>3</sup>. These  
6 subtypes have shown a strong molecular resemblance to distinct epithelial cell types within the  
7 normal mammary gland<sup>4</sup>, and hence, each mammary epithelial cell type has been postulated as  
8 the precursor cell or the ‘cell-of-origin’ for their corresponding subtype<sup>4</sup>. However, how each  
9 cell-of-origin responds to anti-cancer therapies have only begun to be explored<sup>5-7</sup>.

10  
11 The normal adult mammary epithelium is a bilayered ductal structure composed of two major  
12 lineages, luminal and basal, each of which contains a spectrum of populations of varied  
13 differentiation potential and cellular states<sup>8,9</sup>. Fluorescence-activated cell sorting (FACS) can  
14 isolate three phenotypically distinct mammary epithelial cell populations: basal, luminal  
15 progenitor, and luminal mature<sup>10-12</sup> which are essentially the same populations pinpointed as the  
16 major mammary epithelial cell types from unbiased, marker-free classifications from the recent  
17 single-cell RNA sequencing studies<sup>9,13,14</sup>. In general, the luminal progenitor population is  
18 enriched for luminal lineage-restricted progenitor cells that sustain the luminal layer<sup>15,16</sup>, and is  
19 largely hormone receptor negative while the luminal mature population is enriched for more  
20 differentiated, hormone receptor positive cells that lack clonogenic capacity<sup>17</sup>. Unlike the two  
21 luminal populations, the FACS-defined basal population is highly plastic and heterogenous<sup>8,18</sup>,  
22 harbouring mixed cell populations of differentiated myoepithelial cells, basal-restricted

1 progenitors, and possibly, rare bipotent stem cells<sup>9,19</sup>. These populations have many biological  
2 distinctions which can be elucidated to improve their targeting as cell-of-origin in breast cancer.  
3  
4 In recent years, these three main epithelial cell types have been subjected to bulk  
5 transcriptome<sup>8,14,20,21</sup>, epigenome<sup>20,22</sup>, and proteome<sup>5,6</sup> profiling in order to identify unique  
6 biological features that distinguish one cell type from the others, and possibly exploit targeting of  
7 the putative cell-of-origin for that breast cancer subtype. Our recently published proteomic  
8 datasets on mouse<sup>5</sup> and human<sup>6</sup> mammary epithelial cells, led us to identify differential DDR  
9 protein expression across the three main epithelial lineages that we posit leads to intrinsically  
10 divergent cellular activity. We show that the functional capacity of HR repair differs across the  
11 mammary lineages and results in a differential response to PARPi, a class of cancer drugs that  
12 target HR deficiency. To our knowledge, this study is the first to identify cell lineage as a non-  
13 mutational determinant of PARPi sensitivity, and our proteome-based mammary lineage-specific  
14 signatures may clinically inform the most appropriate intervention strategy to enhance PARPi  
15 efficacy.

## 1 Results

### 2 Normal mammary epithelial populations have disparate DNA damage response

3 We interrogated our published normal mouse mammary proteome resource<sup>5</sup> to identify biological  
4 functions uniquely upregulated in basal (Lin<sup>-</sup>CD24<sup>+</sup>CD49f<sup>hi</sup>), luminal progenitor (Lin<sup>-</sup>  
5 CD24<sup>+</sup>CD49f<sup>lo</sup>Sca1<sup>-</sup>CD49b<sup>+</sup>), and luminal mature (Lin<sup>-</sup>CD24<sup>+</sup>CD49f<sup>lo</sup>Sca1<sup>+</sup>CD49b<sup>+/-</sup>)  
6 populations<sup>10,12</sup>, all FACS-purified from virgin female wild-type mice (**Fig. 1a**). Gene set  
7 enrichment analysis<sup>23</sup> revealed 57, 63, and 8 pathways to be uniquely upregulated (false discover  
8 rate (FDR) <0.01) in basal, luminal progenitor, and luminal mature populations, respectively  
9 (**Fig. 1b** and **Supplementary Table 1**). Notably, one-third (23/63) of all enriched pathways in  
10 the luminal progenitor were related to the DNA damage repair (DDR) function (**Fig. 1c**). Most  
11 known breast cancer susceptibility genes participate in DDR<sup>24</sup>, such as *ATM*, *CHEK2*, *MRE11*,  
12 *BRCA1*, *BRCA2*, *RAD51* paralogues, where a functional deficiency in HR repair (e.g. deleterious  
13 mutations in *BRCA1/2*) is prevalent in up to 22% of all breast cancer cases<sup>25</sup>. Of the 156 proteins  
14 known to participate in the DSB repair pathway (R-HSA-5693532; Reactome Database ID  
15 Release 63), 32 were detected in our mouse mammary proteomic dataset and about two-thirds of  
16 them were more abundant in the luminal progenitor population (**Fig. 1d**). We therefore decided  
17 to investigate the physiological DDR across mammary epithelial lineages.

18  
19 Neutral comet assay measures Olive tail moment as a cellular feature of DSBs in individual cells.  
20 FACS-purified mammary populations from un-irradiated wild-type mice revealed a longer Olive  
21 tail moment in the luminal progenitor compared to the luminal mature or basal cells indicating  
22 the higher homeostatic level of DSBs in the luminal progenitor population (**Fig. 2a**). Histone  
23 H2AX phosphorylation,  $\gamma$ -H2AX, marking of DSBs is an early event in DDR which acts as a

1 scaffold for the rapid recruitment of repair proteins to the site of DSBs for efficient DNA  
2 repair<sup>26</sup>. We optimized the irradiation dose (2 to 6 Gy) and time-points (0.5 to 24 hours) to map  
3 *in situ* DNA damage response activation in the mammary gland through staining for  $\gamma$ -H2AX  
4 and 53BP1 foci formation (**Extended Data Fig. 1**). We then quantified the kinetics of  $\gamma$ -H2AX  
5 in the three populations by intracellular flow cytometry (**Fig. 2b** and **Extended Data Fig. 2a-e**)  
6 of the dissociated mammary gland. Irradiation-induced  $\gamma$ -H2AX peaked at 0.5 h and resolved  
7 within 24-48 h in all three mammary epithelial populations, yet individual populations displayed  
8 specific kinetics of  $\gamma$ -H2AX foci formation and resolution over the time course (**Fig. 2b**). The  
9 three epithelial populations had similar proportions of  $\gamma$ -H2AX<sup>+</sup> cells at the early time-points  
10 (**Extended Data Fig. 2b**), however, luminal progenitors had the highest absolute number of  $\gamma$ -  
11 H2AX<sup>+</sup> cells (**Fig. 2c**). Furthermore, the median fluorescence intensity of  $\gamma$ -H2AX was highest  
12 in these cells at the early time-points including the baseline un-irradiated state (**Fig. 2c**).  
13 Likewise, punctate  $\gamma$ -H2AX foci visualized by tissue immunofluorescence were primarily  
14 detected in proliferating, progesterone receptor negative luminal (Ki67<sup>+</sup>PR<sup>-</sup>K14<sup>-</sup>) cells which  
15 characterize luminal progenitors<sup>12,27</sup> (**Fig. 2d** and **Extended Data Fig. 2f**). Therefore, luminal  
16 progenitor population distinguished itself by markedly higher DNA damage response.  
17  
18 To assess the functional outcome of a differential DNA damage response, FACS-purified basal  
19 and total luminal (Lin<sup>-</sup>CD24<sup>+</sup>CD49f<sup>0</sup>) lineages were cultured in a colony forming cell (CFC)  
20 assay to measure lineage-restricted progenitor activity and clonogenic survival with or without *in*  
21 *vitro* irradiation (**Fig. 2e**). The progenitor capacity of both lineages declined after irradiation as  
22 anticipated, yet significantly more luminal colonies survived than the basal colonies (P<0.05;  
23 **Fig. 2e**), indicating that luminal progenitors are more radioresistant than basal progenitors.

1 Collectively, these data show that luminal progenitors are physiologically more susceptible to  
2 DSBs, however, their ability to elicit potent activation of DNA damage response leads to better  
3 survival compared to the basal progenitors.

4

#### 5 **Proliferating basal cells do not engage HR upon genotoxic insult**

6 DSBs are the most lethal forms of DNA damage, and thus accurate DSB repair is critical to  
7 prevent genetic alterations and genomic instability. HR repair uses the undamaged sister  
8 chromatid as a template to accurately repair the DSB region, whereas NHEJ directly ligates the  
9 two DSB ends without any guidance from a homologous DNA sequence and is thus more error-  
10 prone. We assessed HR and NHEJ activities at the single-cell level using Amnis imaging flow  
11 cytometry, which has dual features of flow cytometry and fluorescence microscopy that enable  
12 capturing of spatial information of fluorescence signals. High-throughput quantification of  
13 nuclear repair foci was performed in each mammary population as defined by their established  
14 cell surface markers (**Extended Data Fig. 3a**). Nuclear Rad51 foci and DNA-PKcs (phospho-  
15 S2056; pDNA-PKcs) provided functional readouts for HR and NHEJ, respectively (**Fig. 3a** and  
16 **Extended Data Fig. 3b**). Before irradiation, the highest proportion of Rad51<sup>+</sup> cells was in  
17 luminal progenitors (18%) followed by the luminal mature population (10%), while Rad51 foci  
18 were rarely found in basal cells (1.2%; **Fig. 3b**). This equated to up to 15-fold higher HR activity  
19 in luminal progenitor versus the basal lineage. At 3h post-irradiation, the proportion of Rad51<sup>+</sup>  
20 cells increased in all populations as anticipated, and the luminal lineage still showed a ~4.5-fold  
21 higher Rad51<sup>+</sup> proportion compared to basal ( $P < 0.0001$ ; **Fig. 3b**). Further, luminal progenitors  
22 harboured the highest absolute number of Rad51<sup>+</sup> cells at baseline and post-irradiation  
23 (**Extended Data Fig. 3c**). Conversely, the largest proportion of pDNA-PKcs<sup>+</sup> cells were found in

1 luminal mature (34% at baseline and 54% at 3h post-irradiation) followed by luminal progenitor  
2 (20% and 33%) and basal (5% and 24%) cells, although basal cells displayed the highest fold  
3 increase in NHEJ activity upon irradiation (**Fig. 3c** and **Extended Data Fig. 3d**). Collectively,  
4 these data demonstrate that NHEJ is universally utilized by all mammary epithelial cells, but HR  
5 is predominant in the luminal lineage, especially in the luminal progenitor population.

6  
7 We then delineated cell proliferation status in relation to repair since DSB repair is tightly  
8 regulated by the cell-cycle; HR is restricted to cells in late S and G2 phases whereas NHEJ is  
9 predominantly used during the G1 phase of the cell cycle<sup>28</sup>. Our analysis of HR kinetics, as  
10 determined by *in situ* immunofluorescence staining of the mammary gland, showed that Rad51  
11 foci formed strictly in proliferating (Ki67<sup>+</sup>) cells as early as 0.5 h, and progressed to larger and  
12 punctate foci by 3-6 h post-irradiation (**Extended Data Fig. 4a**, filled arrowheads). Rad51 foci  
13 were present in proliferating luminal (Ki67<sup>+</sup>K14<sup>-</sup>), but largely absent in proliferating basal cells  
14 (Ki67<sup>+</sup>K14<sup>+</sup>; P<0.05; **Fig. 3d,e** and **Extended Data Fig. 4a**). Further luminal characterization by  
15 co-staining of the PR showed that Rad51 foci were predominantly found in luminal progenitors  
16 (K14<sup>-</sup>PR<sup>-</sup>Ki67<sup>+</sup>) rather than luminal mature cells (K14<sup>-</sup>PR<sup>+</sup>Ki67<sup>-</sup>; **Extended Data Fig. 4b,c**).  
17 Conversely, pDNA-PKcs<sup>+</sup> foci were seen in both compartments at all time-points and mostly in  
18 Ki67<sup>-</sup> cells, an observation consistent with the known cell-cycle regulation (**Fig. 3f**). Hence,  
19 among the proliferating mammary epithelial cells, only those with luminal progenitor  
20 characteristics displayed the HR hallmark. In addition to, and perhaps prior to, cell cycle  
21 regulation, DSB repair pathway choice is directed by cell lineage in the normal adult mammary  
22 gland.

23



1 **Basal cells are more sensitive to PARPi than luminal progenitors irrespective of BRCA**  
2 **status**

3 PARPi have proven of immense clinical value in treating cancers with HR defects including  
4 those arising in *BRCA*-mutation carriers<sup>29</sup>. Although PARPi were developed to inhibit the  
5 catalytic activation of PARP, studies showed most potent PARPi exert their therapeutic effect by  
6 “trapping” PARP1/2 at single-strand DNA breaks<sup>30,31</sup>, creating a PARP-DNA complex that  
7 induces replication fork collapse and *de novo* DSBs<sup>32</sup>. As HR repair is essential to resolve these  
8 PARPi-induced DSBs<sup>30</sup>, cells defective in the HR pathway, such as those harbouring deleterious  
9 *BRCA* mutations, are hypersensitive to PARPi due to a synthetic lethal interaction<sup>33,34</sup>. Since we  
10 observed differential HR engagement in the two normal mammary lineages, we assessed the  
11 effect of PARPi on progenitor activity using CFC assays as a readout (**Fig. 4a**). Luminal and  
12 basal progenitors exhibited strikingly divergent vulnerability to PARPi. Basal CFCs decreased  
13 precipitously in a dose-dependent manner in response to olaparib and talazoparib, whereas  
14 luminal CFCs were comparatively resistant to these drugs (**Fig. 4b**). Meanwhile, treatment with  
15 KU-57788, a DNA-PK inhibitor that targets NHEJ, showed no apparent lineage bias (**Fig. 4b**).  
16  
17 We investigated whether the loss of *Brcal* would sensitize luminal progenitors to olaparib since  
18 a synthetic lethal interaction occurs between the PARPi and *BRCA* mutations. *K14-cre<sup>+</sup>;Brcal<sup>fl/fl</sup>*  
19 mice lack *Brcal* in the entire mammary epithelium due to K14 (cytokeratin 14) promoter activity  
20 during embryonic mammary development<sup>35</sup>. A *Brcal* deficiency was expected to increase  
21 olaparib sensitivity, however, *K14-cre<sup>+</sup>;Brcal<sup>fl/fl</sup>* luminal CFCs were only moderately more  
22 sensitive compared to their wild-type littermates (*K14-cre<sup>-</sup>;Brcal<sup>F/F</sup>*; **Fig. 4c**). The loss of *Brcal*  
23 had no effect on basal CFCs, which remained hypersensitive to olaparib (**Fig. 4c**). We also

1 employed transformation-related p53-binding protein 1-null (*Trp53bp1*<sup>-/-</sup>) mice in which cells  
2 can no longer repair DSBs via NHEJ<sup>28</sup>. *Trp53bp1*-deficient basal and luminal CFCs showed no  
3 greater olaparib sensitivity compared to their littermate controls, but still retained the same  
4 lineage-specific PARPi vulnerability (**Fig. 4d**). We also noted lower baseline clonogenic  
5 potential in the untreated *Trp53bp1*-deficient basal CFCs compared to *Trp53bp1*<sup>+/+</sup> or  
6 *Trp53bp1*<sup>+/-</sup> controls (**Fig. 4e**), suggesting that NHEJ-defective basal progenitors are more  
7 sensitive to replication stress in the growth factor enriched CFC assay conditions. Collectively,  
8 by exploiting PARPi-mediated synthetic lethality, we confirmed functional differences in HR  
9 capacity between the two normal mammary lineages in which basal progenitors are intrinsically  
10 sensitive, but luminal progenitors are largely resistant to PARPi, even with a homozygous  
11 deletion of *Brcal*.

12  
13 We examined whether this lineage-dependent vulnerability to PARPi is conserved in humans.  
14 Unlike mouse, primary normal human breast progenitor cells give rise to 3 morphologically  
15 distinct colonies *in vitro*: myoepithelial-restricted, luminal-restricted, and bipotent, which are  
16 indicative of the differentiation capacity of their respective progenitor cell populations<sup>36</sup>.  
17 Myoepithelial colonies represent more differentiated myoepithelial progenitors in the basal (Lin<sup>-</sup>  
18 EpCAM<sup>lo</sup>CD49f<sup>hi</sup>) population, luminal colonies arise from the luminal progenitors (Lin<sup>-</sup>  
19 EpCAM<sup>hi</sup>CD49f<sup>hi</sup>), and bipotent colonies are mostly enriched in the basal fraction<sup>37</sup>. On the other  
20 hand, the luminal mature (Lin<sup>-</sup> EpCAM<sup>hi</sup>CD49f<sup>lo</sup>) population lacks clonogenicity in conventional  
21 CFC culture conditions<sup>37,38</sup> (**Fig. 5a**). Primary breast tissues from 20 patients who underwent  
22 prophylactic mastectomy, including *BRCA* wild-type, *BRCA1*- and *BRCA2*-mutation carriers  
23 (n=5, 9, 6 respectively; 30-64 years old), were dissociated into single cells for phenotypic flow

1 cytometry and matched CFC scoring (**Fig. 5a** and **Extended Data Fig. 5a-c**). We observed  
2 cellular heterogeneity across all patients as well as within *BRCA* cohorts (**Extended Data Fig.**  
3 **5a**). The control (DMSO) CFC score for each colony type generally reflected the proportions of  
4 the epithelial cells in their corresponding flow profiles (**Extended Data Fig. 5b**). We found that  
5 olaparib predominantly affected basal progenitor capacity; abrogating 13% of myoepithelial  
6 ( $P<0.05$ , ratio paired t-test) and 47% of bipotent colonies ( $P<0.0001$ ). In contrast, luminal  
7 colonies remained largely resistant in all patients (**Fig. 5b**). Although higher olaparib sensitivity  
8 was observed in all three colony types generated from *BRCA* carrier samples ( $P<0.05$ ; Two-way  
9 ANOVA; **Fig. 5c**), the colony type remained the major factor in olaparib response, with luminal  
10 lineage being more resistant than basal, even when *BRCA* mutations are present ( $P<0.0001$ ;  
11 Two-way ANOVA; **Fig. 5c**). Thus, mammary lineage is the primary determinant for olaparib  
12 vulnerability in both the mouse and human mammary epithelium.

13

#### 14 **Luminal lineage exhibits higher baseline and progesterone-induced Parp1 activity**

15 To understand the human DDR proteomic landscape, we data-mined our recently published  
16 global human mammary proteome<sup>6</sup> that has profiled the three mammary populations (basal,  
17 luminal progenitors, luminal mature) from 6 normal, premenopausal breast tissues. 127 of the  
18 276 human DDR genes curated by Knijnenburg *et al*<sup>39</sup> were detected in the human proteome  
19 (**Extended Data Fig. 6a**). Unsupervised hierarchical clustering revealed that these human DDR  
20 proteins clustered based on the mammary cell type, and strikingly, most of them appeared to be  
21 less abundant in the basal population (**Extended Data Fig. 6a**). Pairwise comparisons uncovered  
22 differentially expressed DDR proteins between the cell types, and significantly upregulated DDR  
23 proteins from each comparison ( $q<0.05$ ) were subjected to pathway analysis using Enrichr<sup>40,41</sup>

1 (Extended Data Fig. 6b and Supplementary Table 2). KEGG pathways relating to NHEJ and  
2 HR were enriched in human luminal progenitor and luminal mature populations, whereas the  
3 basal population was enriched for single-strand break repair pathways, such as nucleotide  
4 excision repair and base excision repair (Fig. 5d). This illustrates the heterogenous DDR  
5 proteomic landscape of human breast epithelium as observed in the mouse.  
6  
7 We sought the molecular mechanism underlying divergent PARPi response of mammary  
8 clonogenicity by examining PARP superfamily members in our global mammary datasets  
9 including mouse transcriptomes, mouse proteomes and human proteomes. PARP1 is the major  
10 target of PARPi, and its genetic deletion confers high PARPi resistance<sup>30</sup>. Of all detected PARPs  
11 in the proteomes, PARP1 was the most abundant in both mouse and human datasets (Fig. 5e).  
12 We also noted that human PARP1 was ~1.6-fold higher in luminal progenitor and luminal  
13 mature populations compared to basal (Extended Data Fig. 6c). In mouse microarray data<sup>42</sup>, 16  
14 of 17 *Parp* genes were found, including *Parp1*, *Parp4*, and *Parp6*, which were significantly  
15 higher in total luminal, while *Tiparp* (*Parp7*) and *Parp12* were higher in the basal cells ( $q < 0.05$ ;  
16 Fig. 5f). Progesterone is known to expand the number of adult stem/progenitor cells in the  
17 mammary gland<sup>43,44</sup>, and induced a 2.5-fold increase in *Parp1* mRNA level only in the luminal  
18 cells ( $P < 0.01$ ; Fig. 5g). Co-immunostaining of Par and K14 on the normal, un-irradiated mouse  
19 mammary gland following progesterone treatment, provided *in situ* confirmation of increased  
20 Parp1 activity in the luminal versus basal layer of the mammary gland (Fig. 5h). Despite having  
21 more targets for PARPi in luminal cells, their clonogenic capacity remains intact likely due to  
22 their ability to carry out the HR repair. The basis for lineage differences in PARP proteins and  
23 activity requires further study.

1  
2  
3  
4  
5  
6  
7  
8  
9  
10  
11  
12  
13  
14  
15  
16  
17  
18  
19  
20  
21  
22

## **Proteome-defined lineage IDs inform breast cancer subtypes and PARPi response**

We next asked whether lineage identification (ID) can serve as a non-mutational predictor of olaparib sensitivity in breast cancers. We first constructed a set of human proteome signatures (>3-fold enrichment; **Supplementary Table 3**) as IDs for the basal, luminal progenitor and luminal mature populations, and then examined their association with breast cancer subtypes from the METABRIC dataset<sup>45</sup>. The human basal proteomic ID showed the highest correlation to the mesenchymal ‘Claudin-low’ subtype; the luminal progenitor ID was most closely linked to ‘Basal-like’, a subtype that arises frequently in *BRCA1* breast cancers<sup>46,47</sup>; and the luminal mature ID was highly correlated to the most commonly diagnosed, hormone-receptor-expressing ‘Luminal A’ subtype (**Fig. 6a** and **Extended Data Fig. 7a,b**), extending the previously proposed cell-of-origin/subtype model based on transcriptome data<sup>4</sup> to hold true at the protein level. The same association was seen with mouse mammary proteome-generated lineage IDs (**Extended Data Fig. 8a,b** and **Supplementary Table 4**). Additionally, both human and mouse luminal progenitor IDs positively correlated with somatic mutation profile #3<sup>48</sup>, which is associated with HR deficiency and deleterious *BRCA1/2* mutations, whereas the luminal mature IDs showed an inverse correlation and the basal IDs showed no association with defective HR (**Fig. 6b**, **Extended Data Fig. 8c** and **Supplementary Table 5**). This bioinformatics suggest that manifestation of HR loss is prominently observed in breast tumors exhibiting the luminal progenitor signature and underscore the critical requirement of HR for genome integrity particularly in this luminal progenitor population.

1 We then compared our basal and luminal progenitor signatures with 50 human breast cancer cell-  
2 lines from the Genomics of Drug Sensitivity in Cancer database<sup>49</sup> that catalogues their drug  
3 responses to >100 anti-cancer agents. We selected the top 10 cell-lines that showed enrichment  
4 for either basal or luminal progenitor IDs (**Fig. 6c** and **Extended Data Fig. 9a**) and correlated  
5 them with their drug sensitivity data to known 23 DNA-damaging agents, including 5 PARPi  
6 (**Fig. 6d** and **Supplementary Table 6**). Notably, the basal and luminal progenitor-enriched cell-  
7 lines showed differential responses to the DNA-damaging agents (**Extended Data Fig. 9b**).  
8 Specifically, the cell-lines with a strong basal ID had greater sensitivity (i.e. negatively  
9 correlated) to the PARPi response than those with a luminal progenitor ID ( $p \leq 0.014$ ; **Fig. 6d** and  
10 **Supplementary Table 7**). Our lineage IDs also predicted PARPi sensitivity in the order of the  
11 magnitude of PARP-trapping potency: the PARPi that have the least or lesser trapping potency,  
12 such as ABT-888 (veliparib) and AG-014699 (rucaparib), showed less differential sensitivity  
13 compared to olaparib and BMN-673 (talazoparib) which are known to have higher or the highest  
14 trapping potency<sup>50</sup> (**Fig. 6d**). Therefore, normal mammary lineage ID predicted the sensitivity of  
15 breast cancer cell lines to PARPi and may be applicable to other chemotherapeutics.  
16  
17 Finally, we examined whether our lineage IDs can predict PARPi response *in vivo*. Four human  
18 breast cancer cell lines enriched for basal ID and three enriched for luminal progenitor ID were  
19 engrafted into the inguinal mammary gland of 6-7 week-old virgin female NSG mice; only  
20 MDA-MB-231 and HCC1187 cell-lines grew as tumour xenografts *in vivo*, representing “basal”  
21 and “luminal progenitor” breast tumors, respectively (**Extended Data Fig. 10a**). Both cell-lines  
22 are triple-negative for estrogen receptor, progesterone receptor and HER2 status; MDA-MB-231  
23 appears to be mesenchymal-like and has been closely aligned to the Claudin-low tumour

1 subtype<sup>51</sup>, whereas HCC1187 closely resembles the Basal-like tumour subtype<sup>52</sup>. Our flow  
2 cytometry analyses of dissociated fully grown xenografts showed that MDA-MB-231 expressed  
3 CD44, a mesenchymal stem cell marker, in addition to low expression of human epithelial cell  
4 marker (h-EpCAM). In contrast, HCC1187 lacked CD44 and highly expressed EpCAM  
5 (**Extended Data Fig. 10b**). We treated xenografts daily with either olaparib (100 mg/kg; i.p.) or  
6 vehicle control until the mice reached the endpoint (**Fig. 6e**). “Luminal progenitor” HCC1187  
7 tumors showed no difference in growth upon treatment, while olaparib significantly impeded the  
8 growth of “basal” MDA-MB-231 tumors (Multiple t-test; FDR < 0.01; **Fig. 6e**). These data  
9 demonstrate that the intrinsic olaparib resistance identified here for the normal luminal lineage  
10 also prevails in the context of breast cancer xenografts. Furthermore, tumour selection based on  
11 lineage-specific signatures has the potential to identify better responders for achieving greater  
12 olaparib efficacy.

13

## 14 **Discussion**

15 Our understanding of DDR has been limited by the dogma that every cell has the same DSB  
16 repair capacity. Although others have shown variances in DNA repair within the mammary  
17 lineages by examining telomere-associated<sup>53</sup> or oncogene-mediated DDR<sup>54</sup> and by using an HR-  
18 reporter mouse<sup>55</sup>, cell cycle-dependent DSB end-resection has remained the overarching  
19 principle known to dictate the choice between HR and NHEJ<sup>28</sup>. We identify cell lineage as a  
20 novel imperative factor in DSB repair pathway choice in the mammary gland; the luminal  
21 lineage is HR-proficient, whereas the basal lineage is innately limited in HR capacity and  
22 thereby exhibits “BRCAness”<sup>32</sup>. We propose that mammary lineage commitment confers each  
23 epithelial lineage with defined DSB repair machinery which is then regulated by the cell cycle.

1  
2 Current determinants of PARPi sensitivity are based on screening for mutations that confer HR  
3 deficiency. However, both experimental data<sup>56</sup> and clinical trials<sup>57–59</sup> have documented that a  
4 *BRCA* mutation alone does not entirely predict PARPi benefit indicating that factors beyond  
5 *BRCA* mutation are involved. In fact, OlympiAD<sup>60</sup> and EMBRACA<sup>61</sup> breast cancer trials testing  
6 PARPi as single-agent therapy have shown significant improvement, but only by 3 months, in  
7 progression-free survival of *BRCAl/2*-mutated breast cancer patients. This limited success may  
8 be explained by our finding that luminal progenitors, the putative cell-of-origin for *BRCAl* breast  
9 cancers<sup>46,47</sup>, are intrinsically PARPi-resistant, and therefore might not have been effectively  
10 eliminated by PARPi monotherapy (**Fig. 6f**). Work presented here underscores the impact of  
11 mammary lineage on drug response. As such, identification of a patient subgroup whose tumours  
12 exhibit a basal ID and/or reduced luminal progenitor ID may present a method for pinpointing  
13 better responders to PARPi therapy, as demonstrated in our xenografts representing triple-  
14 negative breast cancers.

15  
16 To potentiate PARPi efficacy, combination strategies may be useful especially if they can  
17 simultaneously deplete more than one type of precursor cell/cell-of-origin. Numerous combination  
18 strategies have been tested in *in vivo* experiments and are currently being tested in the clinic,  
19 including chemotherapy<sup>62</sup> (NCT03150576; NCT02163694), targeted therapy<sup>63</sup> (NCT02208375;  
20 NCT01623349), immunotherapy<sup>64</sup> (NCT02484404, NCT02849496, NCT02734004, NCT03594396,  
21 NCT03167619), and endocrine therapy<sup>65,66</sup>. Our work has demonstrated that lineage-specific DSB  
22 repair features explain the possible shortcomings of olaparib alone in *BRCA* breast cancer patients  
23 and offers an opportunity to improve patient stratification to benefit high-risk women.



1

2

## 1 Reference

- 2 1. Sørlie, T. *et al.* Gene expression patterns of breast carcinomas distinguish tumor  
3 subclasses with clinical implications. *Proc. Natl. Acad. Sci. U. S. A.* **98**, 10869–74 (2001).
- 4 2. Prat, A. & Perou, C. M. Deconstructing the molecular portraits of breast cancer. *Mol.*  
5 *Oncol.* **5**, 5–23 (2011).
- 6 3. Parker, J. S. *et al.* Supervised Risk Predictor of Breast Cancer Based on Intrinsic  
7 Subtypes. *J. Clin. Oncol.* **27**, 1160–1167 (2009).
- 8 4. Visvader, J. E. & Stingl, J. Mammary stem cells and the differentiation hierarchy : current  
9 status and perspectives. *Genes Dev.* **28**, 1143–1158 (2014).
- 10 5. Casey, A. E. *et al.* Mammary molecular portraits reveal lineage-specific features and  
11 progenitor cell vulnerabilities. *J. Cell Biol.* **217**, 2951–2974 (2018).
- 12 6. Mahendralingam, M. *et al.* Mammary epithelial cells have lineage-restricted metabolic  
13 identities. *bioRxiv* 798173 (2019). doi:10.1101/798173
- 14 7. Shehata, M. *et al.* Identifying the murine mammary cell target of metformin exposure.  
15 *Commun. Biol.* **2**, 1–11 (2019).
- 16 8. Nguyen, Q. H. *et al.* Profiling human breast epithelial cells using single cell RNA  
17 sequencing identifies cell diversity. *Nat. Commun.* **9**, 1–12 (2018).
- 18 9. Chen, W. *et al.* Single-cell landscape in mammary epithelium reveals bipotent-like cells  
19 associated with breast cancer risk and outcome. *Commun. Biol.* **2**, 306 (2019).
- 20 10. Stingl, J. *et al.* Purification and unique properties of mammary epithelial stem cells.

- 1        *Nature* **439**, 993–7 (2006).
- 2    11.    Shackleton, M. *et al.* Generation of a functional mammary gland from a single stem cell.  
3        *Nature* **439**, 84–8 (2006).
- 4    12.    Shehata, M. *et al.* Phenotypic and functional characterisation of the luminal cell hierarchy  
5        of the mammary gland. *Breast Cancer Res.* **14**, R134 (2012).
- 6    13.    Chung, C.-Y. *et al.* Single-Cell Chromatin Analysis of Mammary Gland Development  
7        Reveals Cell-State Transcriptional Regulators and Lineage Relationships. *Cell Rep.* **29**,  
8        495-510.e6 (2019).
- 9    14.    Giraddi, R. R. *et al.* Single-Cell Transcriptomes Distinguish Stem Cell State Changes and  
10       Lineage Specification Programs in Early Mammary Gland Development. *Cell Rep.* **24**,  
11       1653-1666.e7 (2018).
- 12   15.    Van Amerongen, R., Bowman, A. N. & Nusse, R. Developmental stage and time dictate  
13       the fate of Wnt/ $\beta$ -catenin- responsive stem cells in the mammary gland. *Cell Stem Cell* **11**,  
14       387–400 (2012).
- 15   16.    Van Keymeulen, A. *et al.* Distinct stem cells contribute to mammary gland development  
16       and maintenance. *Nature* **479**, 189–193 (2011).
- 17   17.    Sleeman, K. E. *et al.* Dissociation of estrogen receptor expression and in vivo stem cell  
18       activity in the mammary gland. *J. Cell Biol.* **176**, 19–26 (2007).
- 19   18.    Prater, M. D. *et al.* Mammary stem cells have myoepithelial cell properties. *Nat. Cell Biol.*  
20       **16**, 942–50, 1–7 (2014).

- 1 19. Rios, A. C. *et al.* Essential role for a novel population of binucleated mammary epithelial  
2 cells in lactation. *Nat. Commun.* **7**, 11400 (2016).
- 3 20. Dravis, C. *et al.* Epigenetic and Transcriptomic Profiling of Mammary Gland  
4 Development and Tumor Models Disclose Regulators of Cell State Plasticity. *Cancer Cell*  
5 **34**, 466–482 (2018).
- 6 21. Sun, H. *et al.* Single-cell RNA-Seq reveals cell heterogeneity and hierarchy within mouse  
7 mammary epithelia. *J. Biol. Chem.* **293**, 8315–8329 (2018).
- 8 22. Pellacani, D. *et al.* Analysis of Normal Human Mammary Epigenomes Reveals Cell-  
9 Specific Active Enhancer States and Associated Transcription Factor Networks. *Cell Rep.*  
10 **17**, 2060–2074 (2016).
- 11 23. Subramanian, A. *et al.* Gene set enrichment analysis: A knowledge-based approach for  
12 interpreting genome-wide expression profiles. *Proc. Natl. Acad. Sci.* **102**, 15545–15550  
13 (2005).
- 14 24. Tharmapalan, P., Mahendralingam, M., Berman, H. K. & Khokha, R. Mammary stem  
15 cells and progenitors: targeting the roots of breast cancer for prevention. *EMBO J.* **38**, 1–  
16 19 (2019).
- 17 25. Davies, H. *et al.* HRDetect is a predictor of BRCA1 and BRCA2 deficiency based on  
18 mutational signatures. *Nat. Med.* **23**, 517–525 (2017).
- 19 26. Yuan, J., Adamski, R. & Chen, J. Focus on histone variant H2AX: To be or not to be.  
20 *FEBS Lett.* **584**, 3717–3724 (2010).
- 21 27. Beleut, M. *et al.* Two distinct mechanisms underlie progesterone-induced proliferation in

- 1 the mammary gland. *Proc. Natl. Acad. Sci. U. S. A.* **107**, 2989–94 (2010).
- 2 28. Hustedt, N. & Durocher, D. The control of DNA repair by the cell cycle. *Nat Cell Biol* **19**,  
3 1–9 (2017).
- 4 29. Ashworth, A. & Lord, C. J. Synthetic lethal therapies for cancer: what’s next after PARP  
5 inhibitors? *Nat. Rev. Clin. Oncol.* **15**, 1–13 (2018).
- 6 30. Murai, J. *et al.* Trapping of PARP1 and PARP2 by clinical PARP inhibitors. *Cancer Res.*  
7 **72**, 5588–5599 (2012).
- 8 31. Murai, J. *et al.* Stereospecific PARP Trapping by BMN 673 and Comparison with  
9 Olaparib and Rucaparib. *Mol. Cancer Ther.* **13**, 433–443 (2014).
- 10 32. Lord, C. J. & Ashworth, A. PARP inhibitors: Synthetic lethality in the clinic. *Science* **355**,  
11 1152–1158 (2017).
- 12 33. Farmer, H. *et al.* Targeting the DNA repair defect in BRCA mutant cells as a therapeutic  
13 strategy. *Nature* **434**, 917–921 (2005).
- 14 34. Bryant, H. E. *et al.* Specific killing of BRCA2-deficient tumours with inhibitors of  
15 poly(ADP-ribose) polymerase. *Nature* **434**, 913–917 (2005).
- 16 35. Liu, X. *et al.* Somatic loss of BRCA1 and p53 in mice induces mammary tumors with  
17 features of human BRCA1-mutated basal-like breast cancer. *Proc. Natl. Acad. Sci. U. S.*  
18 *A.* **104**, 12111–6 (2007).
- 19 36. Eirew, P., Stingl, J. & Eaves, C. J. Quantitation of human mammary epithelial stem cells  
20 with in vivo regenerative properties using a subrenal capsule xenotransplantation assay.

- 1        *Nat. Protoc.* **5**, 1945–1956 (2010).
- 2    37.    Stingl, J., Eaves, C. J., Zandieh, I. & Emerman, J. T. Characterization of bipotent  
3        mammary epithelial progenitor cells in normal adult human breast tissue. *Breast Cancer*  
4        *Res. Treat.* **67**, 93–109 (2001).
- 5    38.    Fridriksdottir, A. J. *et al.* Propagation of oestrogen receptor-positive and oestrogen-  
6        responsive normal human breast cells in culture. *Nat. Commun.* **6**, 8786 (2015).
- 7    39.    Knijnenburg, T. A. *et al.* Genomic and Molecular Landscape of DNA Damage Repair  
8        Deficiency across The Cancer Genome Atlas. *Cell Rep.* **23**, 239-254.e6 (2018).
- 9    40.    Chen, E. Y. *et al.* Enrichr: interactive and collaborative HTML5 gene list enrichment  
10       analysis tool. *BMC Bioinformatics* **14**, 128 (2013).
- 11   41.    Kuleshov, M. V. *et al.* Enrichr: a comprehensive gene set enrichment analysis web server  
12       2016 update. *Nucleic Acids Res.* **44**, W90–W97 (2016).
- 13   42.    Shiah, Y.-J. *et al.* A Progesterone-CXCR4 Axis Controls Mammary Progenitor Cell Fate  
14       in the Adult Gland. *Stem Cell Reports* **4**, 313–322 (2015).
- 15   43.    Joshi, P. a *et al.* Progesterone induces adult mammary stem cell expansion. *Nature* **465**,  
16       803–7 (2010).
- 17   44.    Joshi, P. A. *et al.* RANK Signaling Amplifies WNT-Responsive Mammary Progenitors  
18       through R-SPONDIN1. *Stem Cell Reports* **5**, 31–44 (2015).
- 19   45.    Curtis, C. *et al.* The genomic and transcriptomic architecture of 2,000 breast tumours  
20       reveals novel subgroups. *Nature* **486**, 346–352 (2012).

- 1 46. Lim, E. *et al.* Aberrant luminal progenitors as the candidate target population for basal  
2 tumor development in BRCA1 mutation carriers. *Nat. Med.* **15**, 907–13 (2009).
- 3 47. Molyneux, G. *et al.* BRCA1 basal-like breast cancers originate from luminal epithelial  
4 progenitors and not from basal stem cells. *Cell Stem Cell* **7**, 403–17 (2010).
- 5 48. Alexandrov, L. B., Nik-Zainal, S., Wedge, D. C., Campbell, P. J. & Stratton, M. R.  
6 Deciphering signatures of mutational processes operative in human cancer. *Cell Rep.* **3**,  
7 246–59 (2013).
- 8 49. Iorio, F. *et al.* A Landscape of Pharmacogenomic Interactions in Cancer. *Cell* **166**, 740–  
9 754 (2016).
- 10 50. Thomas, A., Murai, J. & Pommier, Y. The evolving landscape of predictive biomarkers of  
11 response to PARP inhibitors. *J. Clin. Invest.* **128**, 1727–1730 (2018).
- 12 51. Prat, A. *et al.* Phenotypic and molecular characterization of the claudin-low intrinsic  
13 subtype of breast cancer. *Breast Cancer Res.* **12**, R68 (2010).
- 14 52. Neve, R. M. *et al.* A collection of breast cancer cell lines for the study of functionally  
15 distinct cancer subtypes. *Cancer Cell* **10**, 515–527 (2006).
- 16 53. Kannan, N. *et al.* The Luminal Progenitor Compartment of the Normal Human Mammary  
17 Gland Constitutes a Unique Site of Telomere Dysfunction. *Stem Cell Reports* **1**, 28–37  
18 (2013).
- 19 54. Morel, A. P. *et al.* A stemness-related ZEB1-MSRB3 axis governs cellular pliancy and  
20 breast cancer genome stability. *Nat. Med.* **23**, 568–578 (2017).

- 1 55. Kass, E. M. *et al.* Double-strand break repair by homologous recombination in primary  
2 mouse somatic cells requires BRCA1 but not the ATM kinase. *Proc. Natl. Acad. Sci. U. S.*  
3 *A.* **110**, 5564–9 (2013).
- 4 56. Lehmann, B. D. *et al.* Identification of human triple-negative breast cancer subtypes and  
5 preclinical models for selection of targeted therapies. *J. Clin. Invest.* **121**, 2750–2767  
6 (2011).
- 7 57. González-Martín, A. *et al.* Niraparib in Patients with Newly Diagnosed Advanced Ovarian  
8 Cancer. *N. Engl. J. Med.* NEJMoa1910962 (2019). doi:10.1056/NEJMoa1910962
- 9 58. Swisher, E. M. *et al.* Rucaparib in relapsed, platinum-sensitive high-grade ovarian  
10 carcinoma (ARIEL2 Part 1): an international, multicentre, open-label, phase 2 trial. *Lancet*  
11 *Oncol.* **18**, 75–87 (2017).
- 12 59. Coleman, R. L. *et al.* Rucaparib maintenance treatment for recurrent ovarian carcinoma  
13 after response to platinum therapy (ARIEL3): a randomised, double-blind, placebo-  
14 controlled, phase 3 trial. *Lancet* **390**, 1949–1961 (2017).
- 15 60. Robson, M. *et al.* Olaparib for Metastatic Breast Cancer in Patients with a Germline  
16 BRCA Mutation. *N. Engl. J. Med.* **377**, 523–533 (2017).
- 17 61. Litton, J. K. *et al.* Talazoparib in Patients with Advanced Breast Cancer and a Germline  
18 BRCA Mutation. *N. Engl. J. Med.* **379**, 753–763 (2018).
- 19 62. Rottenberg, S. *et al.* High sensitivity of BRCA1-deficient mammary tumors to the PARP  
20 inhibitor AZD2281 alone and in combination with platinum drugs. *Proc. Natl. Acad. Sci.*  
21 **105**, 17079–17084 (2008).



- 1 63. Li, X. *et al.* Synergistic action of the MCL-1 inhibitor S63845 with current therapies in  
2 preclinical models of triple-negative and HER2-amplified breast cancer. *Sci. Transl. Med.*  
3 **9**, eaam7049 (2017).
- 4 64. Nolan, E. *et al.* Combined immune checkpoint blockade as a therapeutic strategy for  
5 BRCA1 -mutated breast cancer. *Sci. Transl. Med.* **9**, eaal4922 (2017).
- 6 65. Asim, M. *et al.* Synthetic lethality between androgen receptor signalling and the PARP  
7 pathway in prostate cancer. *Nat. Commun.* **8**, 374 (2017).
- 8 66. Pacey, S. *et al.* A study into the pharmacodynamic biomarker effects of olaparib (PARP  
9 Inhibitor) ± degarelix (GnRH antagonist) given prior to radical prostatectomy (RP)  
10 CANCAP03. *J. Clin. Oncol.* **37**, 35–35 (2019).
- 11 67. Ward, I. M., Minn, K., van Deursen, J. & Chen, J. p53 Binding Protein 53BP1 Is Required  
12 for DNA Damage Responses and Tumor Suppression in Mice. *Mol. Cell. Biol.* **23**, 2556–  
13 2563 (2003).
- 14 68. Stingl, J., Emerman, J. T. & Eaves, C. J. Enzymatic dissociation and culture of normal  
15 human mammary tissue to detect progenitor activity. *Methods Mol. Biol.* **290**, 249–263  
16 (2005).
- 17 69. Filby, A. *et al.* An imaging flow cytometric method for measuring cell division history  
18 and molecular symmetry during mitosis. *Cytom. Part A* **79A**, 496–506 (2011).
- 19 70. Ortyn, W. E. *et al.* Sensitivity measurement and compensation in spectral imaging.  
20 *Cytometry. A* **69**, 852–62 (2006).
- 21 71. Light Microscopy Core Facility/Duke University. Count Nuclear Foci - ImageJ. Available

- 1 at: <https://microscopy.duke.edu/guides/count-nuclear-foci-ImageJ>.
- 2 72. Barbie, D. A. *et al.* Systematic RNA interference reveals that oncogenic KRAS-driven
- 3 cancers require TBK1. *Nature* **462**, 108–12 (2009).
- 4

## 1 **Author Contributions**

2 H.K. designed and performed majority of the experiments and data analyses. A.E.C. generated  
3 mouse and human primary mammary proteomes and developed a workflow of mouse and human  
4 CFC assays. L.P. and M.A.P. performed bioinformatics on TCGA and interrogated GDSC drug  
5 sensitivity dataset. K.A. assisted in vivo drug injections and performed bioinformatics on  
6 METABRIC and GDSC drug sensitivity datasets. S.N. and P.D.W. assisted in vivo engraftment.  
7 S.H., G.D.B guided GSEA pathway analysis and enrichment map visualization. M.P. operated  
8 ImageStream<sup>®</sup>X Mark II instrument and guided post-acquisition data analyses. M.M. and S.N.  
9 assisted in processing primary human breast specimens and human CFC assays. S.H. and H.K.B.  
10 acquired human breast specimens. T.K. generated mouse and human global mammary  
11 proteomes. H.K., P.D.W., M.M. and R.K. wrote and edited the manuscript. R.K. recruited  
12 funding and supervised the study.

13

## 14 **Competing interests**

15 The authors declare no competing financial interests.

## 1 **Figure Legends:**

### 2 **Fig. 1. Global proteomics of normal mouse mammary epithelial populations reveal their** 3 **specific biological programs.**

4 **(a)** A schematic diagram illustrating interrogation of our previously published normal mouse  
5 mammary proteomic dataset. Global proteomic profiles of FACS-purified basal (red; Lin<sup>-</sup>  
6 CD24<sup>+</sup>CD49<sup>hi</sup>), luminal progenitor (LP; blue; Lin<sup>-</sup>CD24<sup>+</sup>CD49<sup>lo</sup>Sca1<sup>-</sup>CD49<sup>+</sup>), or luminal mature  
7 (LM; green; Lin<sup>-</sup>CD24<sup>+</sup>CD49<sup>lo</sup>Sca1<sup>+</sup>CD49<sup>+/-</sup>) epithelial population cells from the mammary  
8 glands of wild-type female mice under sex-hormone stimulation (estrogen plus progesterone;  
9 E+P) were subjected to pathway enrichment analysis using Gene Set Enrichment Analysis  
10 (GSEA). The resulting enriched pathways (FDR<0.01) for each population were visualized into a  
11 network by using Enrichment Map from Cytoscape.

12 **(b)** Enrichment map illustrating clusters of gene-sets/pathways (nodes) significantly upregulated  
13 in the basal, luminal progenitor (LP), or luminal mature (LM) population compared to the other  
14 two as determined by GSEA (FDR<0.01). Each cluster was manually annotated with a common  
15 biological theme.

16 **(c)** Each pathway is colour-coded by corresponding curated database, and pathways related to  
17 DNA damage repair are bolded. The red-dashed line indicates the  $-\log_2(\text{FDR})$  cut-off.

18 **(d)** Heatmap showing unsupervised hierarchical clustering of DDR protein abundance in each  
19 mammary epithelial population (n=2; pooled from multiple mice) curated in the “DNA double-  
20 strand break repair” pathway (R-HSA-5693532; Reactome Database ID Release 63).

1 **Fig. 2. Differential DNA damage response capacity across mammary epithelial populations**  
2 **after irradiation.**

3 **(a)** Workflow of neutral comet assay. Scatter plot showing Olive tail moment on sorted cells  
4 from basal (red), luminal progenitor (blue; LP), and luminal mature (green; LM) populations  
5 from un-irradiated, wild-type female mice. A total of ~450 comets were scored per population  
6 (100-130 comets/population/mouse; n=4 mice). Analysis by one-way ANOVA with Tukey's  
7 multiple comparison test was used. \*\*P<0.01. ns, not significant.

8 **(b)** Workflow depicting intracellular flow cytometry of  $\gamma$ -H2AX on single cells from the  
9 mammary gland, and of immunofluorescence staining on the mammary tissue sections following  
10 6 Gy *in vivo* irradiation. Representative flow cytometry histograms of  $\gamma$ -H2AX recruitment in  
11 basal, LP, LM, and stromal populations at indicated time-points post-irradiation. The dotted line  
12 delineates  $\gamma$ -H2AX positivity ( $\gamma$ -H2AX<sup>+</sup> cells) from the background ( $\gamma$ -H2AX<sup>-</sup> cells) based on  
13 the Fc control.

14 **(c)** Boxplots showing median fluorescence intensity (MFI) in  $\gamma$ -H2AX<sup>+</sup> cells normalized by cell  
15 size (FSC-A; see Extended Data Fig. 2d,e) and absolute number of  $\gamma$ -H2AX<sup>+</sup> cells in each  
16 population (n=4-10 mice per time-point). Two-way ANOVA with Tukey's multiple comparison  
17 test was applied. \*P<0.05, \*\*P<0.01, \*\*\*P<0.001.

18 **(d)** Z-projected confocal immunofluorescence images of  $\gamma$ -H2AX (green), basal cytokeratin  
19 (K14; red), and progesterone receptor or proliferation (PR or Ki67; magenta) in mammary tissue  
20 at 3 h post-irradiation. Filled yellow arrowheads indicate PR<sup>+</sup> cells and hollow indicate PR<sup>-</sup> cells.  
21 Filled white arrowheads indicate Ki67<sup>+</sup> cells and hollow indicate Ki67<sup>-</sup> cells.

1 (e) Workflow of colony forming cell (CFC) assay on FACS-purified basal (red) and total luminal  
2 (blue) cells after *in vitro* irradiation (3 Gy). Basal and luminal progenitors give rise to  
3 corresponding colonies. Luminal mature cells lack clonogenicity in this media condition.  
4 Representative images of basal and luminal colonies with/without irradiation (IR) after 7 days of  
5 culture. Scatter plots showing the absolute counts of basal (red) and luminal (blue) colonies  
6 with/without IR (left; n=13; paired *t*-test). Relative colony count of irradiated samples to the  
7 paired un-irradiated sample are also shown on right (n=13; unpaired *t*-test). All data represent  
8 mean  $\pm$  SEM. \*P< 0.05, \*\*P<0.01, \*\*\*P<0.001.

9

1 **Fig. 3. Homologous recombination (HR) repair is intrinsically different between luminal**  
2 **progenitors and basal cells.**

3 **(a)** A panel of representative ImageStream<sup>®X</sup> images displaying Rad51 foci in the basal, luminal  
4 progenitor (LP), and luminal mature (LM) populations as marked by a set of established cell  
5 surface markers. Foci counts, as determined by IDEAS<sup>®</sup> software, are indicated in yellow in the  
6 Rad51 ‘Foci Mask’ column.

7 **(b,c)** Bar graphs summarizing proportion of cells displaying 0, 1-4, 5-9, or  $\geq 10$  foci of (b)  
8 Rad51 or (c) DNA-PKcs (phospho-S2056; pDNA-PKcs) in each population before or 3 h-post  
9 irradiation. (n=3-4 mice per treatment group). Data represent mean  $\pm$  SEM and p-values  
10 determined by one-way ANOVA with Tukey’s multiple comparison test Rad51<sup>+</sup> or pDNA-  
11 PKcs<sup>+</sup> cells (i.e. cells displaying  $\geq 1$  focus) across all 3 mammary populations. \*\*P<0.01,  
12 \*\*\*P<0.001, \*\*\*\*P<0.0001. ns, not significant.

13 **(d,f)** Z-projected confocal immunofluorescence images of (d) Rad51 and (f) pDNA-PKcs co-  
14 stained with basal cytokeratin (K14) and proliferation (Ki67) markers on paraffin-embedded  
15 mammary tissues harvested from virgin female mice with/without *in vivo* irradiation. Filled  
16 white arrowheads indicate proliferating Rad51<sup>+</sup> cells, and hollow arrowheads indicate  
17 proliferating Rad51<sup>-</sup> cells.

18 **(e)** Absolute counts and proportion of proliferating/Ki67<sup>+</sup> cells exhibiting Rad51<sup>+</sup> ( $\geq 2$  foci) in  
19 basal (K14<sup>+</sup>) or luminal (K14<sup>-</sup>) cells at 3 h post-irradiation by immunofluorescence staining. The  
20 number of Rad51 foci per nucleus was determined by ImageJ. P-value was calculated by Fisher’s  
21 exact test. \*P<0.05.

1 **Fig. 4. Luminal and basal progenitors exhibit divergent PARPi vulnerability.**

2 **(a)** Workflow of colony forming cell (CFC) assay from FACS-purified basal (Lin<sup>-</sup>  
3 CD24<sup>+</sup>CD49f<sup>hi</sup>; red) and total luminal (Lin<sup>-</sup>CD24<sup>+</sup>CD49f<sup>lo</sup>; blue) fractions to evaluate basal and  
4 luminal progenitor capacities in response to the DDR-targeting drugs listed in the table.

5 **(b)** Representative images of basal and luminal colonies treated with olaparib, talazoparib, KU-  
6 57788, or DMSO alone (vehicle control). Bar graphs show the CFC count for basal (red) and  
7 luminal (blue) populations at the indicated drug concentrations after 7 days of culture (n=5-8  
8 mice). One-way ANOVA with Dunnett's multiple comparisons test was performed. \*P<0.05,  
9 \*\*\*P<0.001, \*\*\*\*P<0.0001.

10 **(c,d)** Olaparib sensitivity of the mammary lineages from (c) *Brca1*-deficient mice (*K14-*  
11 *cre<sup>+</sup>;Brca1<sup>fl/fl</sup>*; n=6) and littermate controls (n=5-7) or from (d) *Trp53bp1*-deficient (*Trp53bp1<sup>-/-</sup>*;  
12 n=5) and littermate controls (n=9) using the above CFC workflow. Bar graphs show the number  
13 of basal or luminal colonies relative to DMSO control after olaparib treatment. Data represent  
14 mean ± SEM. Two-way ANOVA with Sidak's multiple comparison's test was performed. \*P<  
15 0.05. ns, not significant.

16 **(e)** Scatter plot demonstrating the absolute colony count of un-irradiated, DMSO-treated basal  
17 and luminal colonies from littermate control (*Trp53bp1<sup>+/+</sup>* or *Trp53bp1<sup>+/-</sup>*; n=9) or experimental  
18 (*Trp53bp1<sup>-/-</sup>*; n=5) cohorts. All data represented as mean ± SEM. P-value was determined by t-  
19 test. \*\*P<0.01.



1 **Fig. 5. Olaparib reduces human mammary basal progenitor capacity.**

2 **(a)** Workflow of the 21 primary human breast specimens from *BRCA* wild-type, *BRCA1* or  
3 *BRCA2*-mutated carriers (n=5, 9, 6, respectively) for flow cytometry and olaparib testing via  
4 colony forming cell (CFC) assay (left). Schematic diagram illustrating human mammary  
5 epithelial populations and representative images of three types of colony that arise from  
6 corresponding progenitor activities (right).

7 **(b)** Boxplot summarizing growth of myoepithelial, bipotent or luminal colonies compared to  
8 DMSO vehicle control (horizontal dotted line), in all primary breast specimens (n=20). P-value  
9 for colony growth in olaparib vs DMSO was calculated by ratio paired t-test. \*P<0.05, \*\*\*\*P <  
10 0.0001.

11 **(c)** Boxplot summarizing the effect of olaparib on the growth of each colony type, according to  
12 *BRCA* mutation status (*BRCA* wild-type, n=5; *BRCA1*-mut, n=9; *BRCA2*-mut, n=6), compared  
13 to DMSO control (horizontal dotted line). Whether the two independent factors, colony type and  
14 *BRCA* mutation status, affected differential colony growth was tested by performing two-way  
15 ANOVA. The colony type significantly affected colony growth upon olaparib treatment  
16 (\*\*p<0.001). The *BRCA* status significantly affected colony growth upon olaparib treatment  
17 (\*p<0.05). No interaction was found between these two factors (p≤0.9754). Post-hoc analysis by  
18 Tukey's multiple comparisons test showed no differences in colony growth of each colony type  
19 based on *BRCA* mutation status (p-values ranging from 0.24-0.98).

20 **(d)** Significantly upregulated (q<0.05) human DDR proteins found in three different pairwise  
21 comparisons between in basal, luminal progenitor (LP), and luminal mature (LM) populations

1 (Extended Data Fig. 6b) were subjected to pathway analyses by Enrichr. The top 5 human  
2 KEGG pathways for every pair were determined based on the ‘combined’ score from Enrichr.

3 **(e)** Protein abundance values of detected Parp/PARP members from mouse (left; n=2, each  
4 pooled from multiple mice) or human (right; n=6) mammary proteome<sup>5</sup>. Differential abundance  
5 of each PARP member across different mammary populations was determined by using one-way  
6 ANOVA with Tukey’s multiple comparisons test. \*P<0.05, \*\*P<0.01, \*\*\*P<0.001. ns, not  
7 significant.

8 **(f)** Mean log<sub>2</sub> fold-change (log<sub>2</sub>FC) of mRNA expression level for 16 (out of 17) members of  
9 the Parp superfamily (Parp15 not detected) in the luminal versus basal lineage determined from a  
10 published microarray analysis<sup>42</sup> on FACS-purified luminal and basal cells from female virgin  
11 mice under ovarian hormone-stimulated (estrogen plus progesterone; E+P) state (n=4/group).  
12 Asterisk indicates q-value < 0.05.

13 **(g)** *Parp1* mRNA levels measured by qRT-PCR in FACS-purified primary mouse basal and total  
14 luminal cells from mice treated with defined sex hormones (estrogen; E or estrogen plus  
15 progesterone; E+P). Expression is normalized to β-actin (endogenous control) and relative to E  
16 basal. P-values were determined by using unpaired *t*-test. \*\*P < 0.01.

17 **(h)** Co-immunostaining of cytokeratin 14 (K14) and PARP1 or PAR on mouse mammary tissue  
18 sections from virgin female mice under defined sex-hormone treatment: estrogen (E) or estrogen  
19 plus progesterone (E+P). Scale bar = 25 μm for all panels.

20

21

1 **Fig. 6. Normal human mammary lineage signatures predict sensitivity to PARPi in human**  
2 **breast cancer cell lines.**

3 **(a)** Violin plots comparing our normal human mammary basal, luminal progenitors, and luminal  
4 mature lineage signatures (one cell type was compared to the other two; fold-change > 5;  $p < 0.05$   
5 from One-way ANOVA in conjunction with Tukey's test) with mRNA expression for each of the  
6 5 major breast cancer subtypes. P-values were adjusted for multiple testing. \*\*\*\*  $P < 0.0001$ .

7 **(b)** Scatter plots depicting the distribution of our human mammary lineage signature score and of  
8 somatic mutation signature #3, which represents HR defect (inferred percentage contribution in  
9 each tumor). The Spearman's correlation coefficients (SCCs) and their corresponding p-values  
10 are indicated. ns, not significant.

11 **(c)** Heatmap showing unsupervised hierarchical clustering of 50 human breast cancer (hBC) cell-  
12 line gene expression profiles based on normal human basal and luminal progenitor proteome-  
13 defined lineage signatures. The top 10 hBC cell-lines that display the largest differential  
14 enrichment (based on the ssGSEA scores) between basal and luminal progenitor signatures are  
15 highlighted in red or blue, respectively.

16 **(d)** Heatmap of Pearson correlation coefficient (PCC) values corresponding to the correlations  
17 between human mammary lineage signature-breast cancer cell-line ssGSEA scores and IC50  
18 values from GDSC. The results are shown for relevant DNA damage-related agents including 5  
19 PARPi ( $p \leq 0.014$ ). The p-value was calculated using unpaired t-test to determine differential  
20 PARPi sensitivity of the top 10 human breast cancer cell-lines enriched for basal or luminal  
21 progenitor lineage signature.

1   **(e)** Schematic diagram illustrates olaparib dosing of human breast cancer (hBC) xenograft  
2   tumours. When the basal signature-enriched MDA-MB-231 or luminal progenitor-enriched  
3   HCC1187 tumours had reached 100-200 mm<sup>3</sup> (n=22 per cell-line), mice were randomized into  
4   two groups and were treated with either vehicle control (10% DMSO in saline solution) or 100  
5   mg/kg olaparib in 10% DMSO daily via intraperitoneal injections until they reached an end-  
6   point. The growth of olaparib-treated MDA-MB-231 (red) or HCC1187 (blue) tumour xenografts  
7   are plotted beside the DMSO control group (black). All data represented as mean ± SEM. P-  
8   values were determined by multiple t-test. \*q<0.001.

9   **(f)** A model summarizing mammary lineage-dependent HR capacity and PARP inhibitor  
10  (PARPi) vulnerability. Normal basal progenitors are selectively targeted by PARPi due to an  
11  intrinsic functional HR deficiency. Meanwhile, HR-proficient normal luminal progenitors are  
12  able to efficiently repair PARPi-induced DNA double-strand breaks, and therefore are  
13  intrinsically resistant to PARPi.

14

## 1 **Supplementary Material:**

### 2 **Methods:**

#### 3 **Mice**

4 8-10 week-old virgin female FVB/NJ mice were purchased from the Jackson Laboratory or  
5 Charles River Laboratories. 8-10 week-old virgin female *K14-cre<sup>+</sup>;Brca1<sup>fl/fl</sup>* transgenic mice<sup>35</sup>  
6 were bred in-house at more than 10 back-crosses in the FVB/NJ background. 12–20 week-old,  
7 virgin female B6;129-*Trp53bp1<sup>tm1Jc</sup>/J* mice<sup>67</sup> were provided by Dr. Daniel Durocher. All FVB  
8 female mice were subcutaneously implanted with a 14-day slow-release pellet of 0.14 mg 17 $\beta$ -  
9 estradiol plus 14 mg progesterone (E+P; Innovative Research of America) one week after bi-  
10 lateral ovariectomy. These mice were sacrificed on the 14<sup>th</sup> day of E+P treatment with or without  
11 whole-body irradiation. 4 week-old virgin female NSG mice were purchased from MaxBell  
12 Basement ARC Barrier Facility for xenograft experiment. All procedures were conducted in  
13 compliance with the Canadian Council for Animal Care guidelines under protocols approved by  
14 Animal Care Committee of the Princess Margaret Cancer Centre, Toronto, Ontario, Canada.

15

#### 16 **Irradiation**

17 ***In vivo:*** Mice were exposed to a single dose of 6 Gray (Gy) from a Cs-137 irradiator  
18 (Gammacell<sup>®</sup> 40 Exactor) and sacrificed at a specified time-point after irradiation.

19 ***In vitro:*** Primary mouse mammary epithelial cells seeded in a 6-well cell culture plate (Greiner,  
20 657160) were irradiated at a single dose of 3 Gy (Gammacell<sup>®</sup> 40 Exactor) on day 1 of the CFC  
21 assay.

1

## 2 **Primary human breast tissue**

3 All human breast tissues were obtained from women undergoing prophylactic mastectomies  
4 within 24-48 hours of surgery at the Princess Margaret Cancer Centre, Toronto, Canada, under  
5 full informed consent and in accordance with Institutional Research Ethics Board approval.

6 Tissues were then processed as described previously<sup>5,68</sup>. Briefly, surgically excised breast tissues  
7 were digested with 300 U/mL collagenase (Sigma, C9891) plus 100 U/mL hyaluronidase  
8 (Sigma, H3884) to isolate mammary organoids, which were cryopreserved in liquid nitrogen  
9 until processed for single-cell suspensions.

10

## 11 **Primary mammary single-cell suspensions**

12 **Mouse:** Mouse single-cell suspension was performed as described previously<sup>10</sup>. Briefly, freshly  
13 harvested mammary glands were minced and incubated in DMEM/F12 media with 300 U/mL  
14 collagenase plus 100 U/mL hyaluronidase (STEMCELL Technologies, 07912) at 37°C for 1.5 h.  
15 Resulting mammary organoids were serially treated with ammonium chloride (STEMCELL  
16 Technologies, 07850), 0.25% trypsin-EDTA (STEMCELL Technologies, 07901) and 5 U/mL  
17 dispase (STEMCELL Technologies, 07913) plus 50 µg/ml DNase I (Sigma, D4513). The  
18 resulting cells were filtered through a 40 µM cell strainer (Fisher Scientific, 22-363-547).

19 **Human:** Human single-cell suspensions were prepared as reported previously<sup>5,68</sup>. Briefly,  
20 previously processed human mammary organoids were thawed from liquid nitrogen and serially

1 digested as above with 0.25% trypsin-EDTA and 5 U/mL dispase and 50 µg/ml DNase I. The  
2 resulting cells were filtered through a 40 µm cell strainer.

3

#### 4 **γ-H2AX intracellular flow cytometry**

5 Freshly dissociated mouse mammary single cells were stained with a viability dye (Zombie UV;  
6 BioLegend, 423107, 1:100) and a cocktail of cell surface markers to exclude lineage<sup>+</sup> (Lin<sup>+</sup>),  
7 including: PE/Cy7-conjugated antibodies to CD45 (hematopoietic; eBioscience, 25-0451-82,  
8 1:800), CD31 (endothelial; eBioscience, 25-0311-81, 1:200), Ter119 (erythrocyte; eBioscience,  
9 25-5921-82, 1:100) cells. Anti-CD24-PerCP-eFluor<sup>®</sup> 710 (eBioscience, 46-0242-80, 1:400), anti-  
10 CD49f-APC (R&D, FAB13501A, 1:100), anti-CD49b-PE (BioLegend, 103506, 1:250), anti-Ly-  
11 6A/E (Sca-1)-APC/Cy7 (BioLegend, 108126, 1:500) were used to segregate basal, LP, LM, and  
12 stromal populations. After cell surface staining, the cells were fixed in 4% paraformaldehyde  
13 (PFA) for 10 min at room temperature, washed in PBS, and stored overnight at 4°C. The next  
14 day, the cells were permeabilized with 0.1% Triton-X/PBS for 5 min at room temperature and  
15 stained with Alexa Fluor<sup>®</sup> 488-conjugated anti-phospho-histone H2A.X (Ser139; γ-H2AX; Cell  
16 Signaling Technology, 9719S, 1:200) or concentration matched Alexa Fluor<sup>®</sup> 488-conjugated  
17 rabbit IgG Isotype (Fc) control (Cell Signaling Technology, 4340S). Flow cytometry acquisition  
18 was performed using BD LSRFortessa<sup>™</sup> and analyzed with FlowJo software (Tree Star, Inc.).

19

#### 20 **Amnis Imaging flow cytometry**

1 **Staining:** Freshly dissociated mouse single cells were stained with a fixable viability Zombie  
2 UV Dye (BioLegend, 423107, 1:100) and a cocktail of cell surface markers including: biotin-  
3 conjugated CD45 (eBioscience, 13-0451-82, 1:800), CD31 (eBioscience, 13-0311-8, 1:200),  
4 Ter119 (eBioscience, 13-5921-81, 1:100) which were subsequently labelled with secondary  
5 conjugate streptavidin-eFluor 450™ (eBioscience, 48-4317-82, 1:500); anti-CD24-APC-eFluor®  
6 780 (eBioscience, 47-0242-82, 1:400), anti-CD49f-PE/Cy7 (BioLegend, 313622, 1:100), anti-  
7 CD49b-PE (BioLegend, 103506, 1:250), anti-Ly-6A/E(Sca-1)-PE-CF594 (Sca-1; BD  
8 Biosciences, 562730, 1:500). After washing, the surface stained cells were fixed in 4% PFA for  
9 10 min at room temperature, washed in PBS, and stored overnight at 4°C. The next day, the cells  
10 were permeabilized with 0.1% Triton-X/PBS for 5 min at room temperature, washed and stained  
11 with anti-Rad51 (H-92; SantaCruz, sc-8319, 1:50) or anti-DNA-PKcs (phospho S2056; Abcam,  
12 ab18192, 1:1,500) which were subsequently labelled with goat anti-rabbit Alexa Fluor® 488-  
13 conjugated secondary antibody (Thermo Scientific, A-11008, 1:200). Nuclear DNA was stained  
14 by DRAQ5™ (ThermoFisher Science 62251, 2.5 µM). Imaging flow cytometry was performed  
15 on an ImageStream®<sup>X</sup> Mark II (Excitation lasers: 405, 488, 561, 592, 642nm; MilliporeSigma)  
16 with INSPIRE® software.

17 **Image acquisition:** Stained cells were resuspended in a volume of 50 µl PBS + 1% FBS in a 1.5  
18 mL low retention microfuge tube (Sigma, T4816). Samples were then acquired on a 5 laser 12  
19 channel ImageStream®<sup>X</sup> Mark II imaging flow cytometer at 60X magnification following  
20 ASSIST calibration (Amnis® Corporation). Channels 1, 2, 3, 4, 6, 7, 9, 11 and 12 were used for  
21 acquisition along with lasers 405 nm (100 mW), 488 nm (150 mW), 561 nm (200 mW), 592 nm  
22 (300 mW) and 642 nm (150 mW) for excitation. A bright-field (BF) area lower limit of 50 µm<sup>2</sup>  
23 was used to eliminate debris and calibration beads during sample acquisition, while samples



1 were collected in a series of  $50 \times 10^3$  event raw image files (.rif). For single stained compensation  
2 controls, BF illumination was turned off and approximately 3000 events within the positive  
3 signal fraction were acquired. An initial compensation matrix was generated by loading the  
4 single stained raw image files into the IDEAS compensation wizard (IDEAS<sup>®</sup> version 6.2) with  
5 further refinements to the compensation matrix made as necessary through manual  
6 adjustment<sup>69,70</sup>. Once generated the compensation matrix was then be applied to the sample raw  
7 image files to create compensated image files (.cif) which were then analyzed.

8 ***High-throughput DSB repair foci counting:*** Analysis was carried out using the IDEAS<sup>®</sup> Software  
9 (version 6.2, Amnis Corporation). Using masks and features as defined in the IDEAS reference  
10 manual (version 6.0, Amnis Coporation). Briefly, the analysis workflow including IDEAS  
11 formatted axis feature/mask descriptors in parenthesis was as follows: (a) Gate on focused cells  
12 using the gradient RMS feature and default M01 mask in the BF channel (Gradient  
13 RMS\_M01\_Ch01). (b) Gate on single cells by plotting features aspect ratio vs area within the M01  
14 mask in the BF channels (Area\_M01 vs. Aspect Ratio\_M01). (c) Gate on circular cells by plotting  
15 features aspect ratio vs circularity within the M01 mask in the BF channels (Circularity\_M01 vs.  
16 Aspect Ratio\_M01). (d) Gate on the viable lineage negative (Lin<sup>-</sup>) population by plotting the  
17 intensity feature of the viability + lineage negative stain vs. area (both viability dye and lineage  
18 negative panel are detected in the same channel (Intensity\_MC\_Ch07 Lin neg/viability vs.  
19 Area\_M01). Lin<sup>-</sup> gate was determined by using fluorescence minus one (FMO) control. (e) The  
20 stromal, luminal and basal populations were distinguished by plotting the intensity features of  
21 CD49f vs. CD24 (Intensity\_MC\_Ch06\_CD49f vs. Intensity\_MC\_Ch12\_CD24). (f) Further  
22 subdivision of the luminal population into luminal progenitor (LP) and luminal mature (LM)  
23 populations was achieved by plotting the intensity features of CD49b vs. intensity of Scal

1 (Intensity\_MC\_Ch03\_CD49b vs. Intensity\_MC\_Ch04\_Sca1). (g) The number of RAD51 or  
2 pDNA-PKcs foci in basal, LP, and LM populations were then quantified using the “Spot Count”  
3 feature based on three different user-defined masks that define nucleus by DRAQ5 signal and  
4 repair foci by signal/intensity and size. The following feature/mask parameters were used to count  
5 Rad51 or pDNA-PKcs foci in single cells. Rad51: Spot Count\_Morphology(M11, Ch11) And  
6 Intensity(M02, Ch02, 1200-4095) And Spot(M02, Ch02, Bright, 9.5, 1, 0)\_4. pDNA-PKcs: Spot  
7 Count\_Morphology(M11, Ch11) And Intensity(M02, Ch02, 1000-4095) And Spot(M02, Ch02,  
8 Bright, 9.5, 1, 0)\_4

9

## 10 **Fluorescence Activated Cell Sorting (FACS) staining**

11 Freshly dissociated mouse mammary epithelial cells were stained with the following antibodies:  
12 PE/Cy7-conjugated lineage antibodies as described above, and various combinations of anti-  
13 CD24-APC-eFluor<sup>®</sup> 780 (eBioscience, 47-0242-82, 1:400), anti-CD24-PerCP-eFluor<sup>®</sup> 710  
14 (eBioscience, 46-0242-80, 1:400), or anti-CD24-FITC (BD Biosciences, 553261, 1:400), and  
15 anti-CD49f-APC (R&D, FAB13501A, 1:100) or anti-CD49f-FITC (BioLegend, 313606, 1:100).  
16 Dead cells were excluded with DAPI (5 mg/mL; 1:10,000). Cell sorting was performed on a BD  
17 FACS Aria<sup>™</sup> II.

18

## 19 **Human mammary epithelial flow cytometry**

20 Freshly dissociated human mammary epithelial cells were stained with antibodies against anti-  
21 CD45-PE/Cy7 (BioLegend, 304016, 1:200), anti-CD31-PE/Cy7 (BioLegend, 303118, 1:50),

1 anti-CD326 (EpCAM)-PE (BioLegend, 324206, 1:50) and anti-CD49f-FITC (BioLegend,  
2 313606, 1:100). Dead cells were excluded with Zombie UV Dye (BioLegend, 423107, 1:100).  
3 Flow cytometry analysis was performed by using BD™ LSR II or BD LSRFortessa™ and  
4 FlowJo software (Tree Star, Inc.).

### 6 ***In situ* immunofluorescence staining**

7 Freshly harvested mouse mammary glands were fixed in 4% PFA at 4°C overnight and stored in  
8 70% EtOH prior to dehydration and embedding into paraffin blocks. Tissue-sections were  
9 deparaffinized and rehydrated prior to antigen retrieval in a pressure cooker (BioMedical) for 30  
10 minutes at 121°C in pH 6.0 citrate buffer. The sections were blocked with 5% goat serum, 1%  
11 glycerol, 0.1% Bovine Serum Albumin, 0.1% cold water fish skin gelatin (Sigma, G7765) in  
12 PBS for 1 h at room temperature. The sections were stained with a cocktail of primary antibodies  
13 that were diluted in the same blocking buffer overnight at 4°C. Next day, the tissue sections were  
14 washed in 0.1% Tween-20/PBS and then incubated with secondary antibodies diluted in  
15 blocking buffer for 1 h at room temperature. The sections were mounted in Anti-fade ProLong™  
16 Gold with DAPI (Thermo Scientific, P36935). Primary antibodies used are as follows: anti-  
17 Keratin 14 (K14; BioLegend, 906004, 1:400), anti-Ki67 (BioLegend, 652402, 1:400), anti-  
18 phospho-Histone H2A.X (Ser139; Cell Signaling Technology, 9718, 1:200), anti-Rad51  
19 (SantaCruz, sc-8319, 1:50), anti-DNA-PKcs (phospho S2056; Abcam, ab18192, 1:400), anti-  
20 progesterone receptor (PR; LifeSpan Biosciences Inc., LS-B5236, 1:400), anti-PARP1 (LifeSpan  
21 Biosciences Inc., LS-B3432, clone A6.4.12, 1:100), anti-PAR (Cell Signaling Technology,  
22 #83732, 1:100). Secondary antibodies used are as follows: anti-rat conjugated to AlexaFluor®

1 647 (Thermo Scientific, A-21247), anti-chicken-Cy<sup>TM</sup>3 AffiniPure (Jackson ImmunoResearch,  
2 103-165-155), and anti-rabbit-AlexaFluor<sup>®</sup> 488 (Thermo Scientific, A11008).

3

#### 4 **Confocal microscopy image acquisition**

5 All tissue immunofluorescence images were acquired on a Zeiss LSM 700 confocal microscope  
6 using a 40X oil-immersion objective lens. At least 3 or 4 Z-planes were acquired.

7

#### 8 ***In situ* foci counting**

9 Z-projected confocal images were analyzed to count nuclear foci in ImageJ, as described  
10 previously<sup>71</sup>. Briefly, DAPI and Rad51 channels were used to identify all nuclei and foci in the  
11 image, respectively. Based on the K14 channel, each nucleus was annotated as “basal” (K14<sup>+</sup>),  
12 “luminal” (K14<sup>-</sup> cells surrounded by K14<sup>+</sup> cells) or “stromal” (K14<sup>-</sup> cells surrounding K14<sup>+</sup>  
13 cells). R software was used to count the total number of nuclei displaying  $\geq 2$  foci (i.e. Rad51<sup>+</sup>  
14 cells) in each population.

15

#### 16 **Colony forming cell (CFC) assay**

17 **Mouse:** Mammary 2D colony-forming assays were performed as described previously<sup>5</sup>. FACS-  
18 purified mouse total basal and luminal cells were plated in 6-well plate (Greiner, 657160) with 2  
19  $\times 10^5$  irradiated NIH-3T3 feeder cells per well in Mouse EpiCult media (STEMCELL  
20 Technologies, 05610) supplemented with 5% FBS, 20 ng/mL hFGF (STEMCELL Technologies,

1 02634), 10 ng/mL bovine EGF (STEMCELL Technologies, 78006), 4 µg/mL heparin  
2 (STEMCELL Technologies, 07980), 5 µM ROCKi (Millipore, SCM075), Antibiotic-  
3 Antimycotic Solution (Wisent, 450-115-EL; 1:100) and incubated in a low oxygen (5%)  
4 incubator at 37°C. On the 7<sup>th</sup> day, colonies were fixed with 1:1 acetone:methanol (v/v) and  
5 stained with Giemsa (Fisher, 264-983) according to their manufacturer's protocol. The total  
6 number of colonies were manually counted under a Leitz dissecting microscope.

7 **Human:** Breast 2D colony-forming assays were performed with patient samples as described  
8 previously<sup>5,36,68</sup>. Total dissociated breast cells were seeded with irradiated NIH 3T3 cells in 60  
9 mm culture dishes (Greiner, 82050-546) that were collagen-coated for 1 h (STEMCELL  
10 Technologies, 04902). Single-cell suspensions of freshly dissociated human breast cells were  
11 cultured in Human EpiCult-B (STEMCELL Technologies, 05601) at 5% oxygen for 10 days. On  
12 day 1, the media was changed to serum (FBS)-free conditions till endpoint. On the 10<sup>th</sup> day,  
13 colonies were fixed, stained and counted as above.

14

#### 15 **Small molecule inhibitors/*In vitro* drug testing**

16 All drugs were dissolved in DMSO such that the final concentration of DMSO did not exceed  
17 0.1% (v/v) in each well/dish. Small molecule inhibitors used were: olaparib (AZD-2281;  
18 MedChem Express, HY-10162; Selleck Chemicals, S1060), talazoparib (BMN-673; MedChem  
19 Express, HY-16106), and KU-57788 (NU7441; Selleck Chemicals, HY-11006). For *in vitro* drug  
20 treatment, the drugs were added into each well or the dishes on day 1 of all CFC assays.

21

## 1 **Neutral comet assay**

2 FACS-sorted basal, LP and LM cells were resuspended in PBS at 20,000 cells/mL and were  
3 mixed with 0.7% low-melting point agarose gel at 1:10 ratio. Each population mixture was laid  
4 on a glass slide pre-coated with 1% normal melting point agarose and covered with an 18x18  
5 mm coverslip. The coverslips were carefully removed after gel solidification at 4°C, and the  
6 slides were then processed according to the manufacturer's recommendation (Trevigen Neutral  
7 CometAssay®). Briefly, slides were immersed in Lysis solution (Trevigen; 4250-050-01) at 4°C  
8 overnight and then immersed in 1X Neutral Electrophoresis buffer for 30 min. The slides were  
9 transferred to the CometAssay® electrophoresis unit filled with chilled 1X Neutral  
10 Electrophoresis buffer and electrophoresed at 21 V for 7 min at 4°C. The slides were then fixed  
11 in DNA Precipitation Solution followed by 70% ethanol for 30 min each at room temperature.  
12 The slides were dried at room temperature and stained with SYBR® Gold gel staining solution  
13 (Thermo Fisher, S-11494, 1: 10,000). The Olive tail moment was measured by using Komet  
14 Software (Andor Technology), and at least 100 comets were analysed per population per mouse.

15

## 16 **Gene set enrichment analysis (GSEA)**

17 Protein expression profiles<sup>5</sup> of basal, LP, and LM populations from adult female mice that were  
18 treated with estrogen plus progesterone were included in the pathway analysis by using GSEA,  
19 and those exposed to estrogen alone were excluded in this analysis. GSEA was performed as  
20 described previously<sup>23</sup>. Briefly, protein expression profiles of each mammary population were  
21 compared to those of the other two populations (“Rest”) to determine biological pathways that  
22 were uniquely upregulated or downregulated in that population. The Gene Matrix Transposed

1 (.gmt) or [Mouse\\_GOBP\\_AllPathways\\_no\\_GO\\_iaa\\_August\\_01\\_2017\\_UniProt.gmt](#) file was  
2 accessed from the Bader Lab gene sets website  
3 ([http://download.baderlab.org/EM\\_Genesets/current\\_release/](http://download.baderlab.org/EM_Genesets/current_release/)) and used for GSEA and  
4 enrichment map visualization. GSEA parameters were defined as suggested by the Bader Lab  
5 GSEA Tutorial website ([https://enrichmentmap.readthedocs.io/en/docs-](https://enrichmentmap.readthedocs.io/en/docs-2.2/Tutorial_GSEA.html#step-1-generate-gsea-output-files)  
6 [2.2/Tutorial\\_GSEA.html#step-1-generate-gsea-output-files](https://enrichmentmap.readthedocs.io/en/docs-2.2/Tutorial_GSEA.html#step-1-generate-gsea-output-files)).

### 8 **Enrichment map visualization**

9 GSEA results were visualized by using the Enrichment Map App in Cytoscape v3.5.1. Only the  
10 upregulated gene sets or pathways that have met the cut-off of  $FDR < 0.01$  were clustered by  
11 using the MCL cluster algorithm in the clusterMaker App. Then, each cluster was manually  
12 annotated with a common biological theme. A node (circle) represents a single pathway defined  
13 by publicly available databases curated by the Bader Lab. An edge (line) represents the extent of  
14 shared genes between the two nodes.

### 16 **Heatmap of mouse DDR protein abundance**

17 Protein abundance values of the genes curated in the “DNA double-strand break repair” pathway  
18 (R-HSA-5693532; Reactome Database ID Release 63) was queried in our previously published  
19 mouse mammary proteomic dataset<sup>5</sup>. The heat map shows the z-scores of LFQ-adjusted IBAQ  
20 values in basal, luminal progenitor (LP), and luminal mature (LM) cell types from estrogen plus  
21 progesterone (E+P) samples.

1

## 2 **Human breast cancer cell-lines**

3 All 7 human breast cancer cell-lines used in this study were purchased from either ATCC or  
4 DSMZ. MDA-MB-231 (ATCC<sup>®</sup> HTB-26<sup>™</sup>), Hs 578T (ATCC<sup>®</sup> HTB-126<sup>™</sup>), EFM-192A (ACC  
5 258), and EVSA-T (ACC 433) were cultured in DMEM media + 10% FBS. HCC1395 (ATCC<sup>®</sup>  
6 CRL-2324<sup>™</sup>), BT-549 (ATCC<sup>®</sup> HTB-122<sup>™</sup>), and HCC1187 (ATCC<sup>®</sup> CRL-2322<sup>™</sup>) were  
7 cultured in RPMI media + 10% FBS. All cell-lines were incubated at 37°C, 5% CO<sub>2</sub>.

8

## 9 **Human breast cancer cell-line engraftment**

10 Each human breast cancer cell-line in PBS was mixed with Matrigel<sup>®</sup> (Corning, 356231) in 1:1  
11 v/v ratio. A total of 10 µl cell-Matrigel mixture containing 5×10<sup>5</sup> cells was injected directly into  
12 the right inguinal mammary gland of 6-7-week-old virgin female NSG mice using a Hamilton  
13 syringe. Xenograft tumours were monitored twice a week starting 7 days after engraftment.  
14 Tumour dimensions were measured with a Vernier caliper two times a week and tumour volume  
15 (mm<sup>3</sup>) was estimated by  $0.5 \times (\text{minimum diameter in mm})^2 \times (\text{maximum diameter in mm})$  from  
16 day 7 post-injection until the end of the study. Mice were sacrificed when humane endpoints  
17 were reached (tumour volume >1500 mm<sup>3</sup>, cumulative clinical score >8 or a max score for any  
18 animal condition, or limb paralysis).

19

## 20 ***In vivo* drug testing**



1 1 g of olaparib (MedChemExpress, HY-10162) was dissolved in 10 mL of DMSO and stored at -  
2 80°C. A fresh aliquot of 100 mg/mL olaparib stock was diluted 1:10 in the vehicle solution (10%  
3 w/v 2-hydroxypropyl- $\beta$ -cyclodextrin in PBS) at the time of injection. Once MDA-MD-231 and  
4 HCC1187 tumors reached a volume of 100-200 mm<sup>3</sup>, mice were randomized into two groups  
5 and were treated with either vehicle control (10% DMSO in the vehicle solution) or 100 mg/kg  
6 olaparib daily via intraperitoneal injections until they reached an endpoint as described above.

7

### 8 **Human DDR proteomic analysis**

9 The expressions of DDR proteins in the three mammary epithelial populations: basal (BC),  
10 luminal progenitor (LP), and luminal mature (LM) was extracted from our previously published  
11 human mammary epithelial proteome<sup>6</sup>. The proteomic dataset contains log<sub>2</sub>-transformed iBAQ-  
12 adjusted LFQ values representing protein abundance which were adjusted for batch effects using  
13 the ComBat function in the 'sva' R package (version 3.30.1). Only samples from premenopausal  
14 patients were taken into account (n=6 for each BC, LP, LM cell types). Of the 276 curated  
15 human DDR genes<sup>39</sup>, 127 proteins were detected in the mammary proteomic dataset based on  
16 matching by gene symbol.

17

### 18 **Volcano plot and Pathway analysis on the human DDR proteins**

19 Of 127 DDR proteins, proteins were defined as highly expressed or enriched in one cell type if  
20 they met the fold-change (FC) and statistical significance cut-offs compared to the other two cell  
21 types. Enriched proteins had a log<sub>2</sub>FC > 0 and a p-value < 0.05 (paired t-test; p-value was

1 adjusted for multiple testing via FDR) and were visualized in a volcano plot. The top 5  
2 “upregulated” and “downregulated” proteins were based on rank values from the summation of  
3 p-value and fold-change ranks. The protein with the lowest p-value was given a rank of 1, while  
4 the highest earned the rank of r, which represents the number of total proteins (i.e. 127). For  
5 upregulated, the protein with the most positive log<sub>2</sub>FC value was given a rank of 1, while the  
6 least positive (log<sub>2</sub>FC > 0) value was given a rank of r. For downregulated, the protein with the  
7 most negative log<sub>2</sub>FC value was given a rank of 1, while the least negative (log<sub>2</sub>FC < 0) value  
8 was given a rank of r. The gene names of all enriched proteins were visually labelled in volcano  
9 plots. Pathway analysis of all enriched proteins/genes for each cell type queried KEGG 2019  
10 terms using Enrichr (<https://amp.pharm.mssm.edu/Enrichr/>). The top 5 enriched pathways was  
11 determined based on the ‘combined’ score and were visualized in bar charts.

12

### 13 **Generation of human and mouse lineage signatures**

14 The total mammary proteome consisted of 6034 (human) and 4695 (mouse) annotated proteins.  
15 Basal, luminal progenitor and luminal mature lineage signatures were acquired by searching for  
16 proteins enriched in one cell type compared to the other two cell types with a fold-change > 5 in  
17 human or fold-change > 3 in mouse and p < 0.05 in one-way ANOVA in conjunction with  
18 Tukey’s test.

19

### 20 **Correlations to breast cancer subtypes**

1 Human and mouse lineage signatures in breast cancer expression profiles from METABRIC via  
2 single-sample Gene Set Expression Analysis (ssGSEA) using the ‘GSVA’ R package (version  
3 1.30.0). The scores were categorized by PAM50 plus Claudin-low subtypes for each signature  
4 and assessed for significance using a one-way ANOVA and Tukey’s multiple comparisons test.  
5 TCGA breast cancer RNA-seq and somatic mutation data were obtained following approval by  
6 the Data Access Committee (project #11689). The results published here are partly based upon  
7 data generated by TCGA managed by the NCI and NHGRI at <http://cancergenome.nih.gov>.

8

### 9 **Correlations to COSMIC somatic mutational signatures**

10 Thirty different somatic mutational signatures from COSMIC (Catalogue Of Somatic Mutations  
11 In Cancer) were defined using the mutSignatures package in R<sup>48</sup>. The signature scores were  
12 computed using the ssGSEA algorithm<sup>72</sup> with standard parameters and using all genes included  
13 in each set. Spearman’s correlation coefficients and p-values were computed in R.

14

### 15 **Enrichment in human breast cancer cell-lines**

16 Enrichment of human or mouse lineage signatures in 50 human breast cancer cell-lines from the  
17 Genomics of Drug Sensitivity in Cancer database was determined using the ssGSEA algorithm.  
18 For mouse signatures, gene symbols were converted to human homologs using the ‘biomaRt’ R  
19 package (version 2.38.0). Top cell-lines were defined as having the greatest differences between  
20 basal and luminal progenitor signatures in ssGSEA enrichment scores.

21

## 1 **Correlation to breast cancer cell-line drug sensitivity screening**

2 Pearson correlations were performed to measure the association between enrichment scores for  
3 each cell type and IC50 values of 23 DDR-related drugs (targeting ‘DNA replication’ or  
4 ‘Genome integrity’) in human breast cancer cell-lines from the Genomics of Drug Sensitivity in  
5 Cancer portal<sup>49</sup>. Only the top ten cell-lines that were enriched for each basal and luminal  
6 progenitor signature were considered. Pearson’s correlation coefficients and p-values were  
7 computed in R. The IC50 data was from:

8 [https://www.cancerrxgene.org/gdsc1000/GDSC1000\\_WebResources/Home.html](https://www.cancerrxgene.org/gdsc1000/GDSC1000_WebResources/Home.html)

9

1 **Extended Data Fig. 1. Optimization of *in situ* DDR detection in the mammary gland after**  
2 **whole-body irradiation.**

3 **(a)** Immunofluorescence images showing the dose response of  $\gamma$ -H2AX foci formation (green) in  
4 the nucleus (DAPI; blue) in the mammary gland of adult virgin female mice 1 h after receiving 2,  
5 4, or 6 Gray (Gy) of irradiation *in vivo*.

6 **(b)** Time course of 53BP1 (tumor protein p53-binding protein 1; green) foci formation in basal  
7 (K14; red) and luminal (K14<sup>-</sup>) cells with a proliferation (Ki67; magenta) marker in the mammary  
8 gland harvested at 0.5, 1, 3, 6, or 24 h after 6 Gy *in vivo* irradiation.

1 **Extended Data Fig. 2. Comprehensive characterization of  $\gamma$ -H2AX *in situ* and by**  
2 **intracellular flow cytometry.**

3 **(a)** Flow cytometry gating strategy for the exclusion of doublets, dead cells (Zombie UV<sup>+</sup>), and  
4 the lineage (Lin<sup>+</sup>) population consisting of hematopoietic (CD45<sup>+</sup>), endothelial (CD31<sup>+</sup>), and  
5 erythrocytes (Ter119<sup>+</sup>) from total primary single-cell suspensions from digested mammary  
6 gland. The resulting live Lin<sup>-</sup> cells were separated into basal (red), luminal (black), or stromal  
7 (grey) populations based on CD24 and CD49f cell surface markers. The total luminal cells were  
8 further separated based on Sca1 and CD49b cell surface markers into luminal progenitor (LP;  
9 blue) and luminal mature (LM; green) populations.

10 **(b)** Time course showing the proportion of  $\gamma$ -H2AX<sup>+</sup> cells in mammary epithelial and stromal  
11 populations after *in vivo* irradiation (6 Gy). One-way ANOVA with Dunnett's multiple  
12 comparison test was applied (n=4-10 mice per time-point). \*P<0.05, \*\*P<0.01, \*\*\*\*P<0.0001.

13 **(c)** Time course showing the median fluorescence intensity (MFI) of stromal  $\gamma$ -H2AX<sup>+</sup> cells  
14 normalized by cell-size (FSC-A; see Extended Data Fig. 2d,e) and the absolute number of  $\gamma$ -  
15 H2AX<sup>+</sup> cells at different time-points after irradiation. One-way ANOVA with Dunnett's multiple  
16 comparison test was applied (n=4-10 mice per time-point). \*P<0.05, \*\*\*P<0.001.

17 **(d)** Scatter plot demonstrating median cell-size (FSC-A) of basal, LP, LM, and stromal  
18 populations from individual mice (n=70 mice per population). P-values were calculated by one-  
19 way ANOVA with Tukey's multiple comparison test. \*P<0.05, \*\*\*P<0.001. ns, not significant.

20 **(e)** Density plot of nuclear area of single-cell images from the ImageStream®<sup>X</sup> analyses. Nucleus  
21 was determined by DRAQ5 stains and the nuclear area calculated by built-in Area function in the  
22 IDEAS™ software for basal (n=41,060 cells), LP (n=70,849), LM (n=17,368) and stromal (n =

- 1 178,403) populations from a pool of 10 mice. All data represented as mean  $\pm$  SEM. P-values
- 2 were determined by ordinary one-way ANOVA. \*\*\*\*P<0.0001.
- 3 **(f)** Post-irradiation time course of  $\gamma$ -H2AX (green) foci formation in mammary tissue sections
- 4 after irradiation (6 Gy; n=4-10 mice per time-point). Basal cells are marked by K14 (red) and
- 5 proliferating cells by Ki67 (magenta).
- 6

1 **Extended Data Fig. 3. ImageStream®<sup>X</sup> gating strategies, pDNA-PKcs foci visualization, and**  
2 **absolute counts of Rad51 and pDNA-PKcs-foci containing cells.**

3 **(a)** A workflow depicting the gating strategy for post-acquisition image processing using the  
4 IDEAS™ software. Of all acquired images from ImageStream®<sup>X</sup> Mark II imaging flow  
5 cytometry, focused cells were selected to further gate for single cells defined by morphological  
6 features (i.e. aspect ratio, area, and circularity) based on brightfield (CH01) images. The  
7 resulting live (Zombie UV<sup>-</sup>), Lin<sup>-</sup> (lineage (CD45<sup>+</sup>CD31<sup>+</sup>Ter119<sup>+</sup>)-depleted) population was  
8 separated based on CD24, CD49f, Sca1, and CD49b cell surface markers to acquire basal,  
9 luminal progenitor (LP), and luminal mature (LM) populations.

10 **(b)** A panel of representative ImageStream®<sup>X</sup> images displaying pDNA-PKcs (phospho-S2056)  
11 foci in the basal, LP, LM, and stromal cells at 3 h post-irradiation. The number of pDNA-PKcs  
12 foci was determined using built-in masking techniques that identify nuclear punctate signals  
13 based on the DRAQ5 nuclear mask and pDNA-PKcs foci stains. Automatically counted foci  
14 number is indicated in yellow at the upper right corner of the ‘Foci Mask’ column.

15 **(c,d)**, Absolute cell counts displaying 0, 1-4, 5-9, or  $\geq 10$  foci of (c) Rad51 or (d) pDNA-PKcs in  
16 the basal, LP, and LM populations at un-irradiated (No IR) or 3 h post-irradiation. Nuclear foci  
17 were counted in 1,000-7,000 (up to 10,000) mammary epithelial cells per mouse; a total of n=3  
18 mice per treatment group. P-values were determined by one-way ANOVA with Tukey’s multiple  
19 comparison test on Rad51<sup>+</sup> or pDNA-PKcs<sup>+</sup> cells (i.e. foci number > 0) across all 3 populations.  
20 Data represent mean  $\pm$  SEM \*\*\*P<0.001, \*\*\*\*P<0.0001. ns, not significant.

21



1 **Extended Data Fig. 4. Characterizing the relationships between Rad51 foci formation and**  
2 **cell proliferation or progesterone receptor status.**

3 **(a)** Z-projected immunofluorescence imaging of the time course of Rad51 (green) foci formation  
4 in mammary glands taken from un-irradiated female virgin mice or post-irradiation (6 Gy) at 0.5,  
5 1, 3, 6, or 24 h. Basal cells (K14; red), and proliferating cells with Ki67 (cyan). Filled and hollow  
6 arrowheads indicate Rad51<sup>+</sup> and Rad51<sup>-</sup> proliferating (Ki67<sup>+</sup>) cells, respectively.

7 **(b)** Z-projected immunofluorescence images of Rad51 (green), K14 (red), and progesterone  
8 receptor (PR; magenta) in mammary gland at 3 or 6 h post-irradiation *in vivo*.

9 **(c)** Immunofluorescence images of Ki67 (green) and PR (red) in un-irradiated mammary glands.

10

1 **Extended Data Fig. 5. Individual characterizations of primary human breast specimens.**

2 **(a)** Individual flow cytometric profiles of dissociated single-cells from *BRCA* wild-type, *BRCAl*  
3 and *BRCA2*-mutated human primary breast tissue specimens. Each patient specimen was  
4 assigned a Roman numeral. Density plots show basal (red; Lin<sup>-</sup>EpCAM<sup>lo</sup>CD49<sup>hi</sup>), luminal  
5 progenitor (LP; blue; Lin<sup>-</sup>EpCAM<sup>hi</sup>CD49<sup>hi</sup>), and luminal mature (LM; black; Lin<sup>-</sup>  
6 EpCAM<sup>hi</sup>CD49<sup>lo</sup>) populations separated by EpCAM and CD49f surface markers from live  
7 (DAPI<sup>-</sup>), Lin<sup>-</sup> (CD45<sup>+</sup>CD31<sup>+</sup>-depleted) cells. Corresponding pie charts illustrate the proportion  
8 of basal, LP, and LM populations relative to total mammary epithelial cells.

9 **(b)** Stacked bar charts illustrate relative colony growth in the presence of DMSO vehicle control  
10 (D) or olaparib (Ol) of myoepithelial (yellow), bipotent (maroon), and luminal (blue) colonies  
11 for individual patient specimens.

12 **(c)** Age distribution of *BRCA* wild-type, *BRCAl*, and *BRCA2*-mutated patient cohorts (n=5, 9, 6,  
13 respectively). P-values were determined by one-way ANOVA with Tukey's multiple comparison  
14 test. ns, not significant.

15

1 **Extended Data Fig. 6. Characterizing human DDR proteome of three major mammary**  
2 **epithelial cell types.**

3 **(a)** Heatmap showing unsupervised hierarchical clustering of detected 127 DDR protein  
4 abundance from FACS-purified, normal human basal (red), luminal progenitor (blue; LP), and  
5 luminal mature (green; LM) cell populations from premenopausal women who underwent  
6 reduction mammoplasty. Normal breast tissues were staged as either follicular (progesterone-  
7 low; n=3) or luteal (progesterone-high; n=3) hormonal state. Each DDR gene name is annotated  
8 in one or more DDR pathway as shown on the left; Base Excision Repair (BER), Nucleotide  
9 Excision Repair (NER), Mismatch Repair (MMR), Fanconi Anemia (FA), Homology-dependent  
10 recombination (HDR), Non-homologous End Joining (NHEJ), Direct Repair (DR), Translesion  
11 Synthesis (TLS), Nucleotide pools (NP), and Others. Asterisks indicate gene names that have  
12 been annotated as a ‘core’ member in a single DDR pathway as defined by Knijnenburg *et al*<sup>39</sup>.

13 **(b)** Volcano plots showing differential expression of 127 DDR proteins from the human  
14 mammary proteomic dataset generated from FACS-purified basal, luminal progenitor (blue; LP)  
15 and luminal mature (green, LM) cell populations. The x-axis indicates the relative difference in  
16 protein abundance between the two selected populations (log<sub>2</sub> fold-change); the y-axis indicates  
17 p-values adjusted for multiple correction testing. The grey horizontal line depicts a q-value of  
18 0.05. The gene names of the top 5 significantly upregulated proteins were coloured according to  
19 the cell type that were found in for each comparison. Asterisks identify ‘core members’ of one of  
20 the 10 DDR pathways defined by Knijnenburg *et al*<sup>39</sup>.

1 (c) Protein abundance for each Parp/PARP member, expressed relative to the highest value  
2 within the three cell types. P-values were determined by two-way ANOVA with Tukey's  
3 multiple comparisons test. \*P<0.05, \*\*P<0.01, \*\*\*P<0.001, \*\*\*\*P<0.0001. ns, not significant.

4

1 **Extended Data Fig. 7. Human mammary proteome-based lineage signatures associate with**  
2 **breast cancer subtypes similar to proposed cell-of-origin model.**

3 **(a, b)** Unsupervised hierarchical clustering of (a) METABRIC or (b) TCGA breast cancer  
4 mRNA gene expression profiles based on our human proteome-defined mammary lineage  
5 signatures representing basal, luminal progenitor, and luminal mature mammary populations  
6 (fold-change>5, p<0.05; One-way ANOVA in conjunction with Tukey's test compared to the  
7 other two cell types). (b) Boxplots depict the expression score of each human lineage signature  
8 versus the 4 TCGA breast cancer subtypes.

9

1 **Extended Data Fig. 8. Mouse mammary proteome-based lineage signatures associate with**  
2 **breast cancer subtypes similar to proposed cell-of-origin model.**

3 **(a,b)** Unsupervised hierarchical clustering of (a) METABRIC or (b) TCGA breast cancer mRNA  
4 gene expression profiles based on mouse proteome-defined mammary lineage signatures  
5 representing basal, luminal progenitor, and luminal mature mammary populations (fold-change >  
6 3,  $p < 0.05$  by one-way ANOVA in conjunction with Tukey's test compared to the other two cell  
7 types; see Supplementary Table 4). (a) Violin plots depict the expression score of each of three  
8 mouse lineage signatures across 5 breast cancer subtypes. Unpaired t-test was used, and p-values  
9 were adjusted for multiple testing. \* $P < 0.05$ , \*\*\* $P < 0.001$ , \*\*\*\* $P < 0.0001$ . ns, not significant. (b)  
10 Boxplots depict the expression score of each mouse lineage signature versus the 4 TCGA breast  
11 cancer subtypes.

12 **(c)** Scatter plots depicting the distribution of normal mouse mammary proteome-defined basal,  
13 luminal progenitor, or luminal mature signature (fold-change > 3;  $p < 0.05$ ) scores versus the  
14 somatic mutation signature #3, which represents HR defect (inferred percentage contribution in  
15 each tumor). The Spearman's correlation coefficients (SCCs) and their corresponding p-values  
16 are indicated. ns, not significant.

17

1 **Extended Data Fig. 9. Correlations between human mammary lineage signatures and drug**  
2 **sensitivity to 23 DNA-damaging anti-cancer agents.**

3 **(a)** Heatmap showing unsupervised hierarchical clustering of 50 human breast cancer (hBC) cell-  
4 line gene expression profiles based on our mouse basal and luminal progenitor proteomic  
5 signatures. The top 5 hBC cell-lines that display the largest differential enrichment (based on the  
6 ssGSEA scores) between basal and luminal progenitor signatures are highlighted in red or blue,  
7 respectively.

8 **(b)** Heatmap of Pearson correlation coefficient (PCC) values corresponding to the correlations  
9 between human basal and luminal progenitor signature scores and drug sensitivity (based on  
10 normalized half-maximal inhibitory values or IC<sub>50</sub>) from GDSC<sup>49</sup>. The results are shown for 23  
11 relevant DDR-related agents categorized under ‘DNA replication’ or ‘Genome integrity’. The 5  
12 PARP inhibitors have been bolded.

13

1 **Extended Data Fig. 10. *In vivo* and *in vitro* characterization of the 7 human breast cancer**  
2 **cell-lines.**

3 **(a)** Growth curve of tumour xenografts from 4 basal (red) and 3 luminal progenitor (blue)  
4 signature-enriched human breast cancer (hBC) cell-lines in female NSG mice (n = 3-4 per cell-  
5 line). Tumour length (mm) was measured twice a week until the end-point. Representative  
6 images of fully-grown MDA-MD-231 and HCC1187 xenografts are shown on the bottom. All  
7 data represented as mean  $\pm$  SEM.

8 **(b)** Flow cytometric analysis on single-cell suspensions from freshly dissociated full size MDA-  
9 MD-231 or HCC1187 xenograft tumours. Doublet-excluded, Lin<sup>-</sup> (CD45<sup>+</sup>CD31<sup>+</sup>-depleted), live  
10 (Zombie UV<sup>-</sup>) cells were separated by the human-specific epithelial marker h-EpCAM and the  
11 mesenchymal marker CD44.



1 **Supplementary Table 1: Full report of gene set enrichment analysis (GSEA).**

2 Detailed ranked lists of pathways found in mouse basal, luminal progenitor (LP) or luminal

3 mature (LM) population compared to the other two populations (“Rest”) based on FACS-

4 purified population-specific protein expression profiles. Gene sets or pathways that have FDR

5  $< 0.01$  are highlighted in yellow and were used to create the enrichment map for Fig. 1b,c.

6

1 **Supplementary Table 2: Complete lists of human KEGG pathway enrichment analyses.**

2 By using Enrichr<sup>40,41</sup>, pathway analyses was conducted on the human DDR proteins that were  
3 found to be significantly upregulated in populations from individual pairwise comparisons as  
4 described in Extended Data Fig. 6b. Pathways are ranked in the order of ‘combined’ score.

5

1 **Supplementary Table 3: Detailed human gene lists representing the three proteome-based**  
2 **human mammary lineage signatures.**

3 Three unique groups of gene names that represent proteins upregulated in each of the human  
4 basal ( $\text{Lin}^- \text{EpCAM}^{\text{lo}} \text{CD49}^{\text{fhi}}$ ), luminal progenitor (LP;  $\text{Lin}^- \text{EpCAM}^{\text{hi}} \text{CD49}^{\text{fhi}}$ ), or luminal mature  
5 (LM;  $\text{Lin}^- \text{EpCAM}^{\text{hi}} \text{CD49}^{\text{do}}$ ) populations. Each human mammary lineage signature was acquired  
6 by selecting gene names whose protein abundance was over-expressed > 5-fold in one mammary  
7 epithelial population compared to the other two ( $p < 0.05$ ; One-way ANOVA with Tukey's  
8 multiple comparison test) based on the iBAQ-adjusted LFQ protein expression values from  
9 normal human mammary proteomic dataset<sup>6</sup>.

1 **Supplementary Table 4. Detailed mouse gene lists representing the three proteome-based**  
2 **mouse mammary lineage signatures.**

3 Three unique groups of mouse gene names that represent proteins upregulated in each of the  
4 mouse basal ( $\text{Lin}^- \text{CD24}^+ \text{CD49f}^{\text{hi}}$ ), luminal progenitor (LP;  $\text{CD24}^+ \text{CD49f}^{\text{lo}} \text{Sca1}^- \text{CD49b}^+$ ), or  
5 luminal mature (LM;  $\text{CD24}^+ \text{CD49f}^{\text{lo}} \text{Sca1}^+ \text{CD49b}^{+/-}$ ) populations. Each mouse mammary lineage  
6 signature was acquired by selecting gene names whose protein abundance was over-expressed >  
7 3-fold in one mammary epithelial population compared to the other two ( $p < 0.05$ ; One-way  
8 ANOVA with Tukey's multiple comparison test) based on the iBAQ-adjusted LFQ protein  
9 expression values from normal mouse mammary proteomic dataset<sup>5</sup>.

1 **Supplementary Table 5. Complete list of correlations between COSMIC somatic mutation**  
2 **signatures and our human and mouse mammary lineage signatures.**

3 Full list of Spearman's rank correlation coefficients and their corresponding p-values were  
4 determined between COSMIC's 30 somatic mutation signatures and our 3 human or mouse  
5 mammary lineage signatures.

6

**1    Supplementary Table 6. Correlations between human breast cancer cell-lines and our**  
**2    human and mouse mammary lineage signatures.**

3    Gene expressions of 50 human breast cancer (hBC) cell-lines from GDSC were correlated to our  
4    human or mouse proteome-based, basal (BC) and luminal progenitor (LP) lineage signatures.  
5    Each hBC cell-line was scored based on the correlations between each signature via single-  
6    sample Gene Set Expression Analysis (ssGSEA). Then, score difference (BC.ssGSEA minus  
7    LP.ssGSEA) was calculated and sorted in the descending order. The highest score difference  
8    correspond to hBC cell-lines that are enriched with the basal signature; the lowest score  
9    difference correspond to hBC cell-lines that are enriched with the luminal progenitor signature.

1 **Supplementary Table 7. Correlations between known drug sensitivity of the human breast**  
2 **cancer cell-lines and our human mammary lineage signatures.**

3 Pearson's correlation coefficient was determined for the known drug sensitivity (IC50) of 23  
4 DDR-related agents in the top 10 human breast cancer cell-lines enriched for either basal or  
5 luminal progenitor signatures (as determined in Supplementary Table 5).

6

Kim et al. Fig. 1

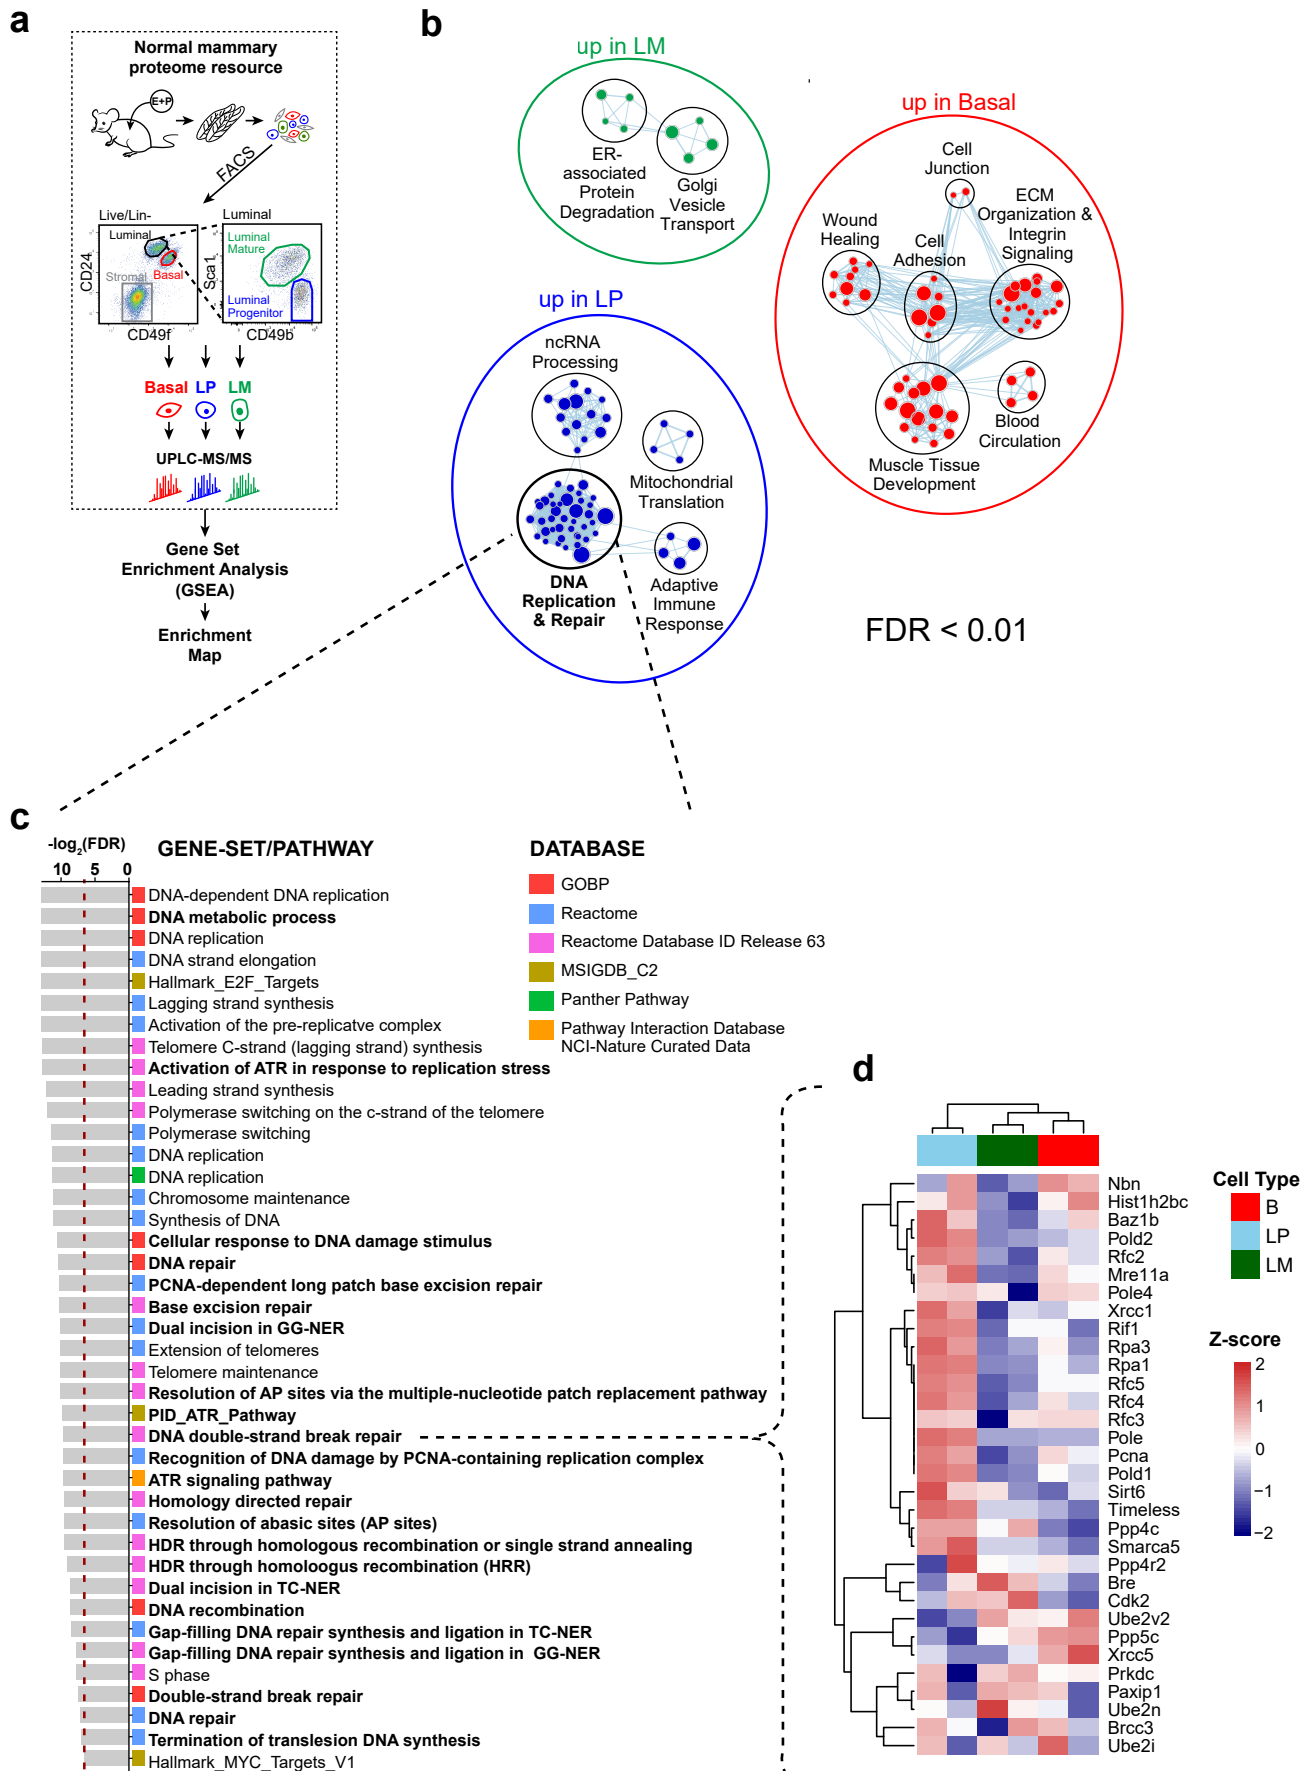



Kim et al. Fig. 2

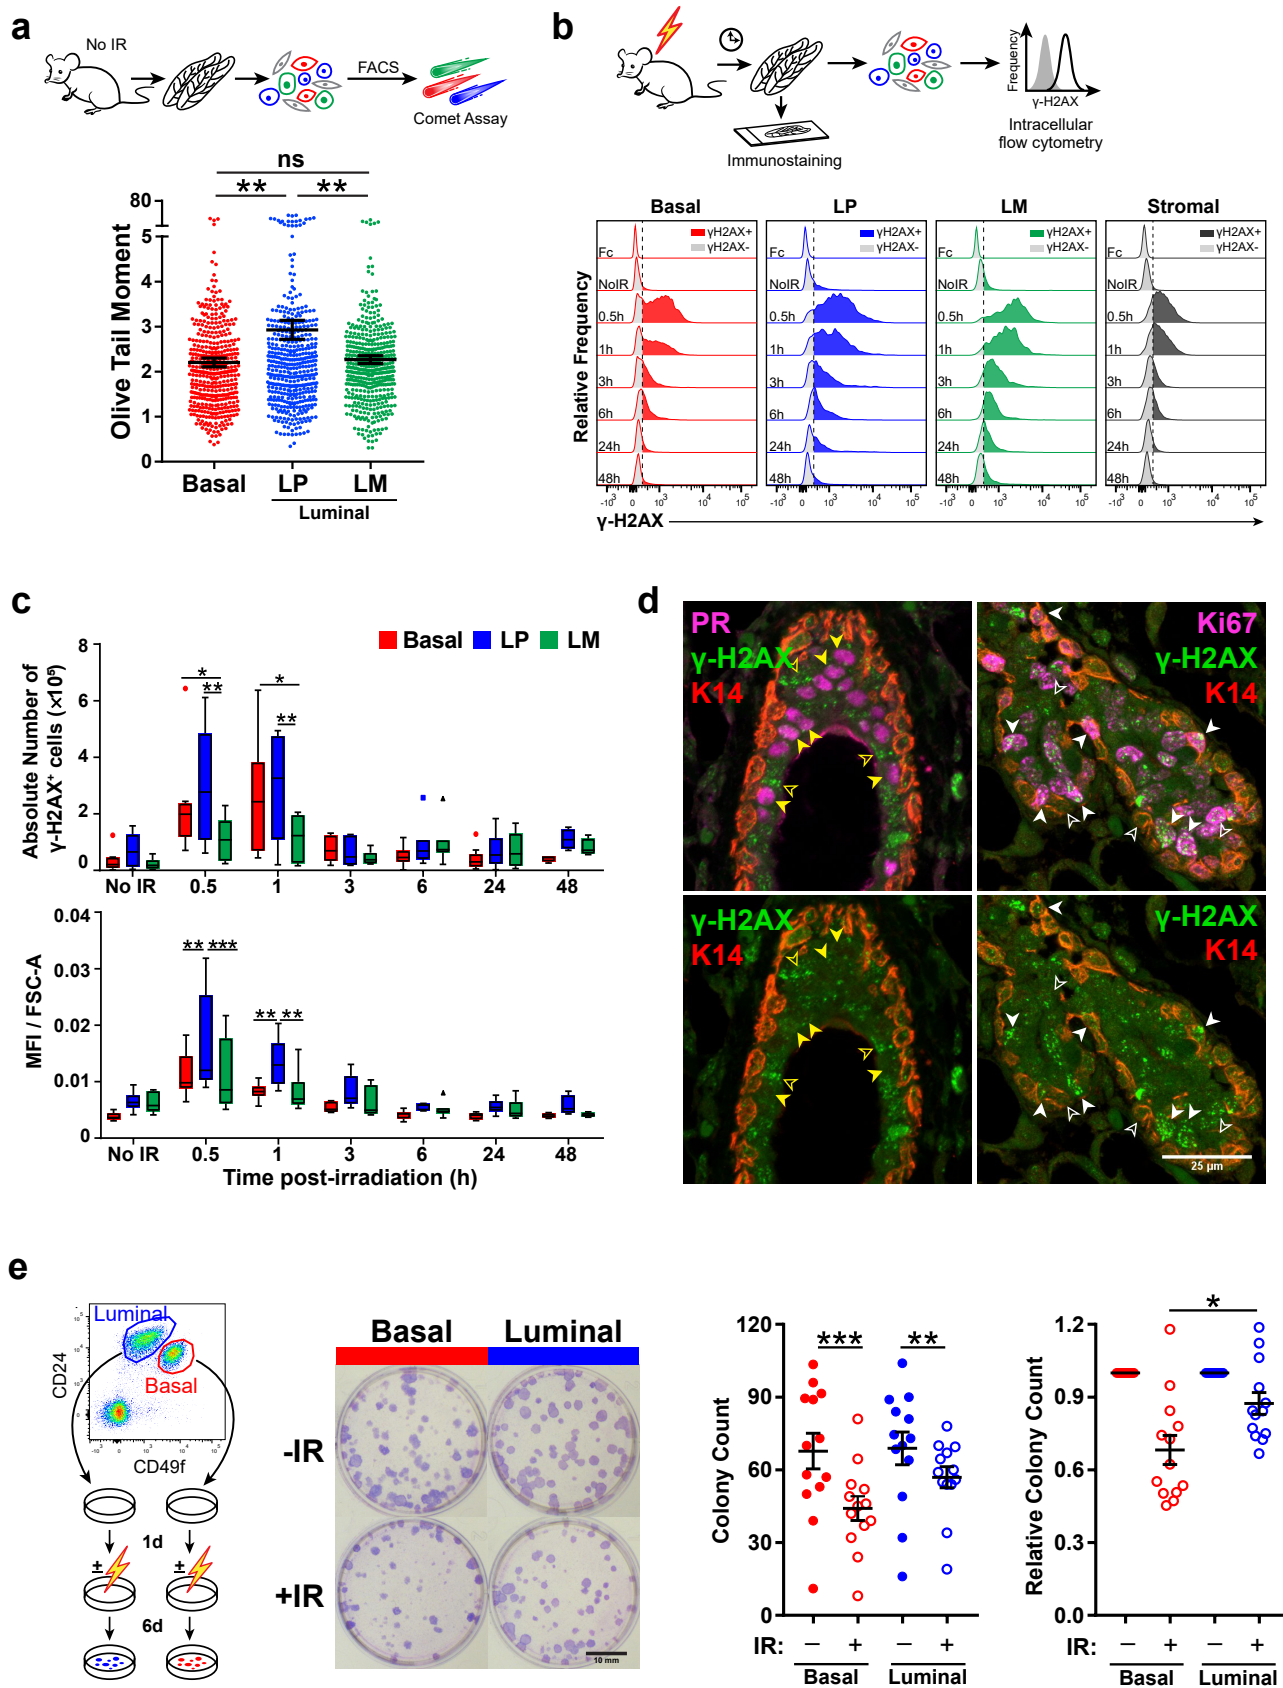

Kim et al. Fig. 3

a

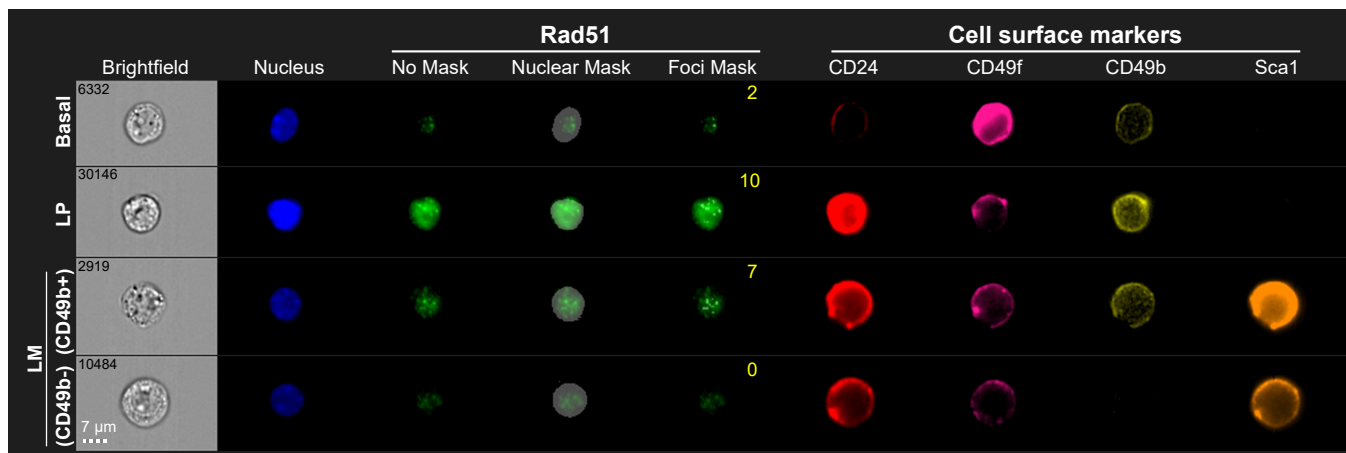

b

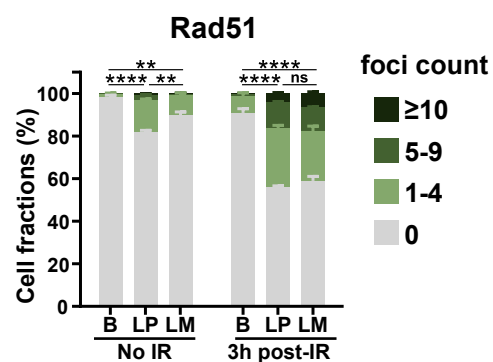

c

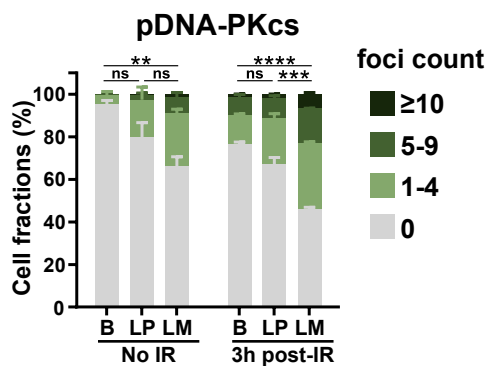

e

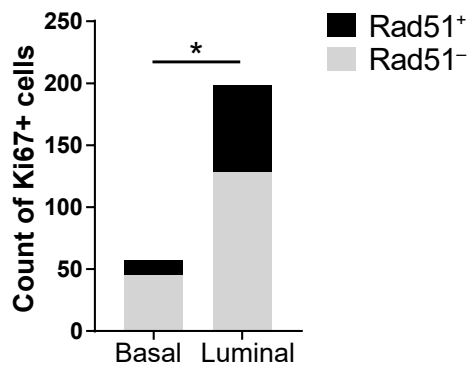

d

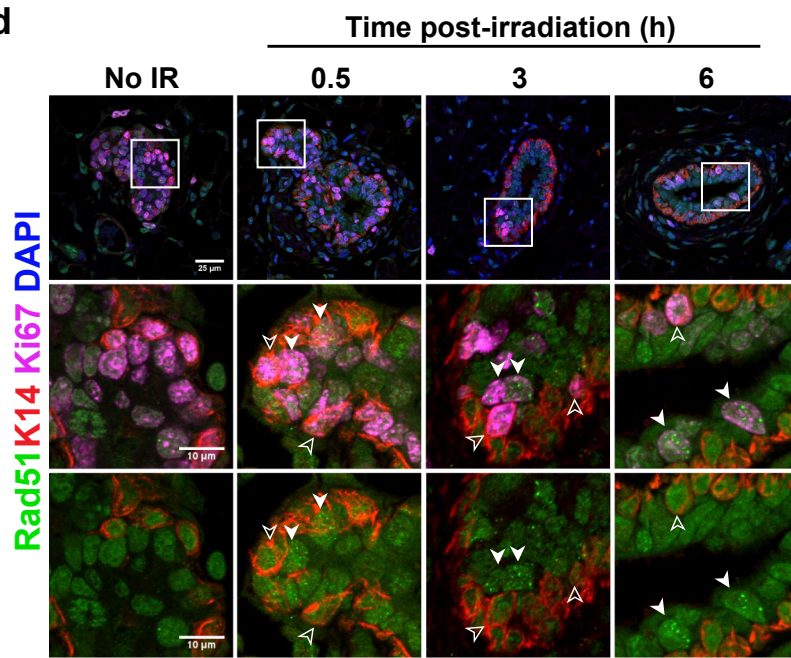

f

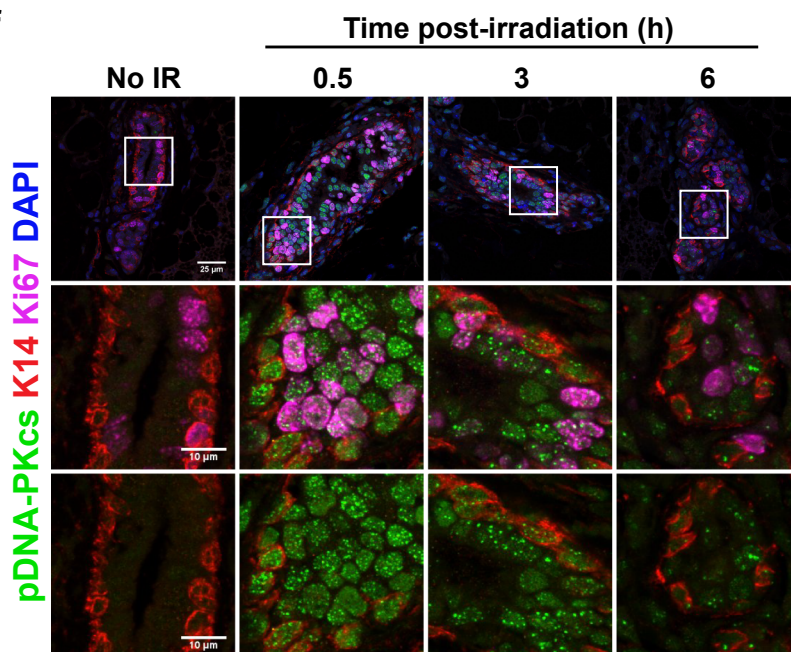

Kim et al. Fig. 4

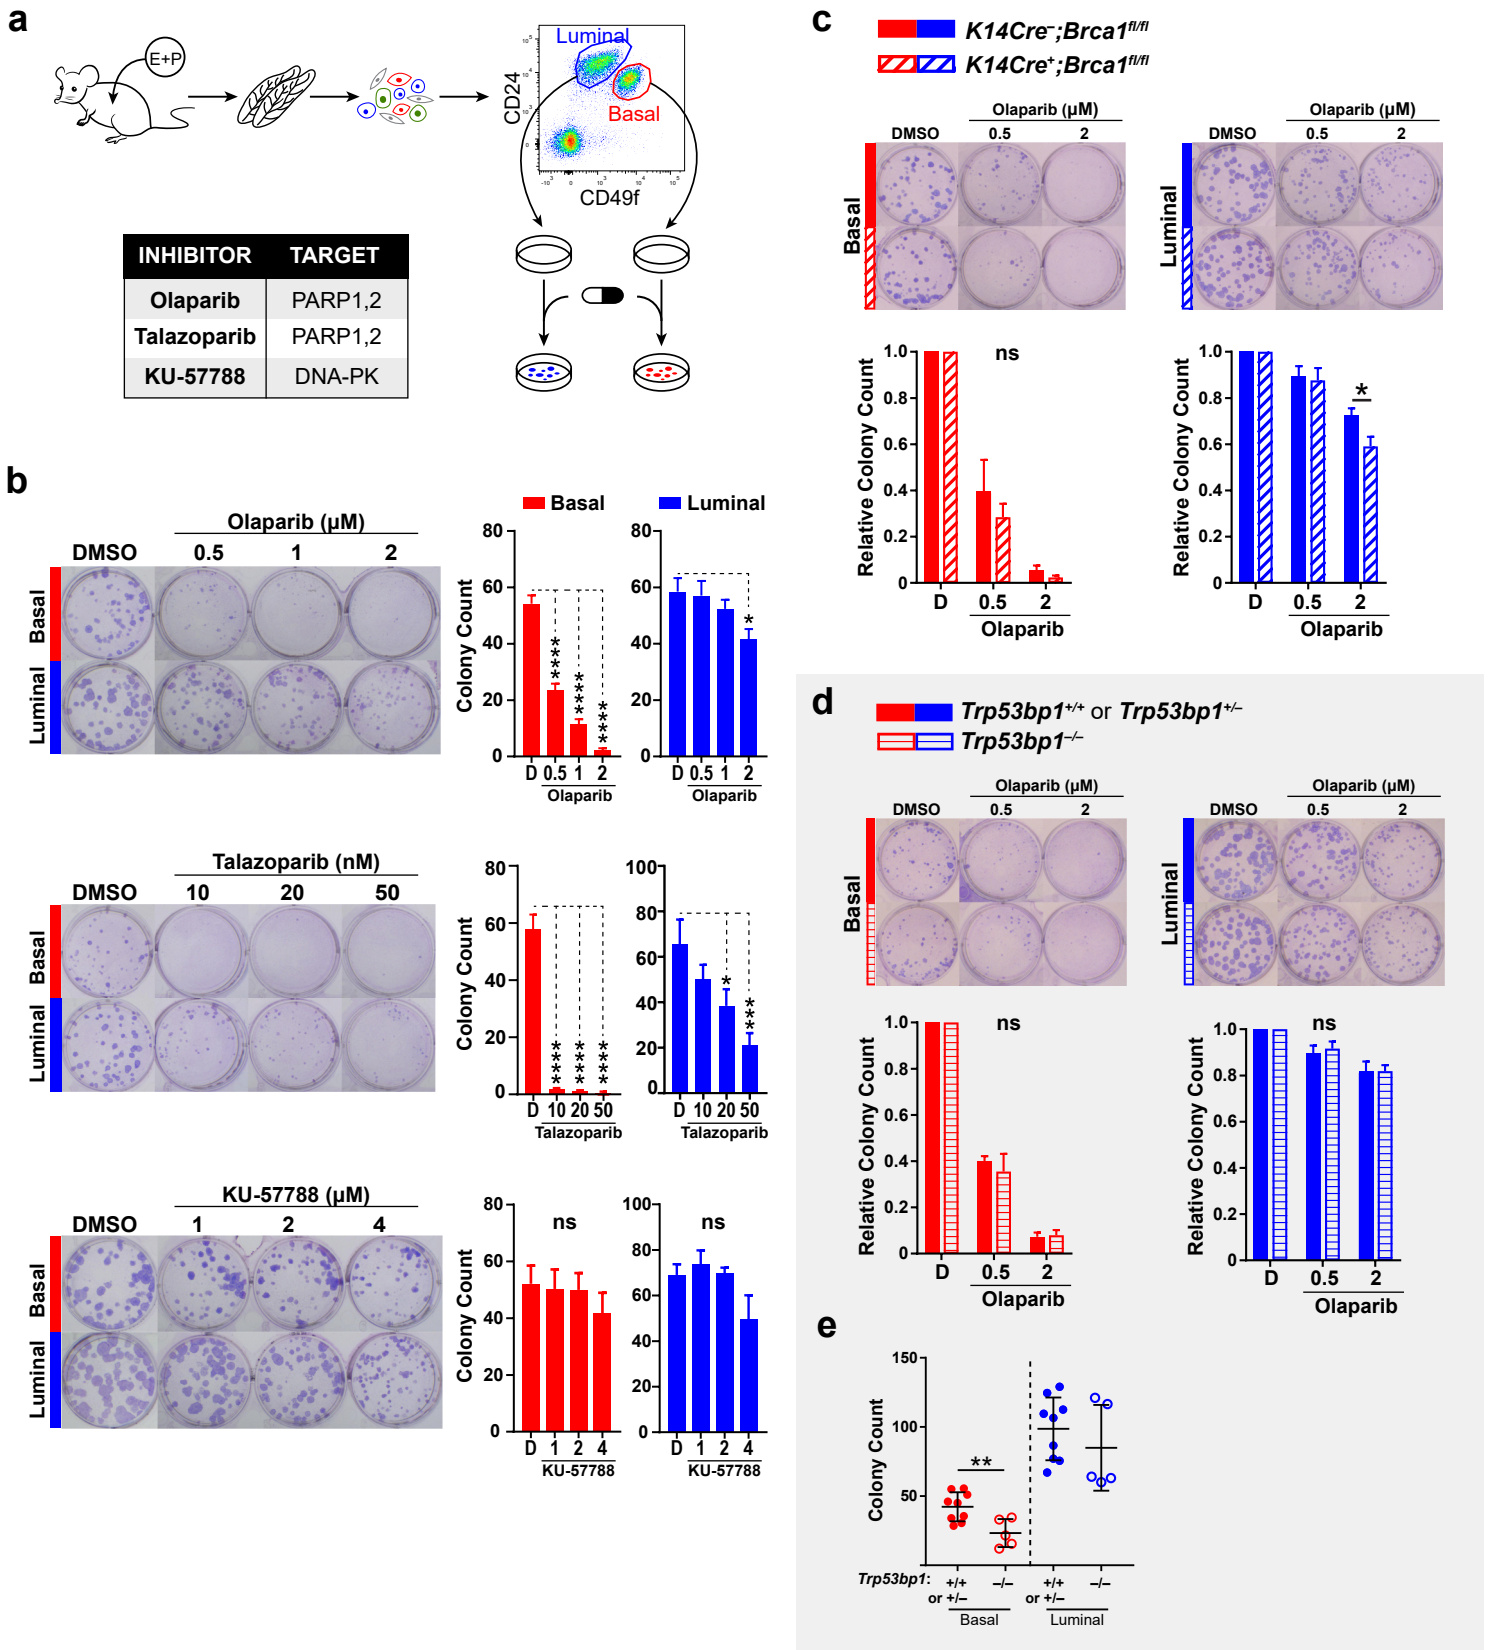

Kim et al. Fig. 5

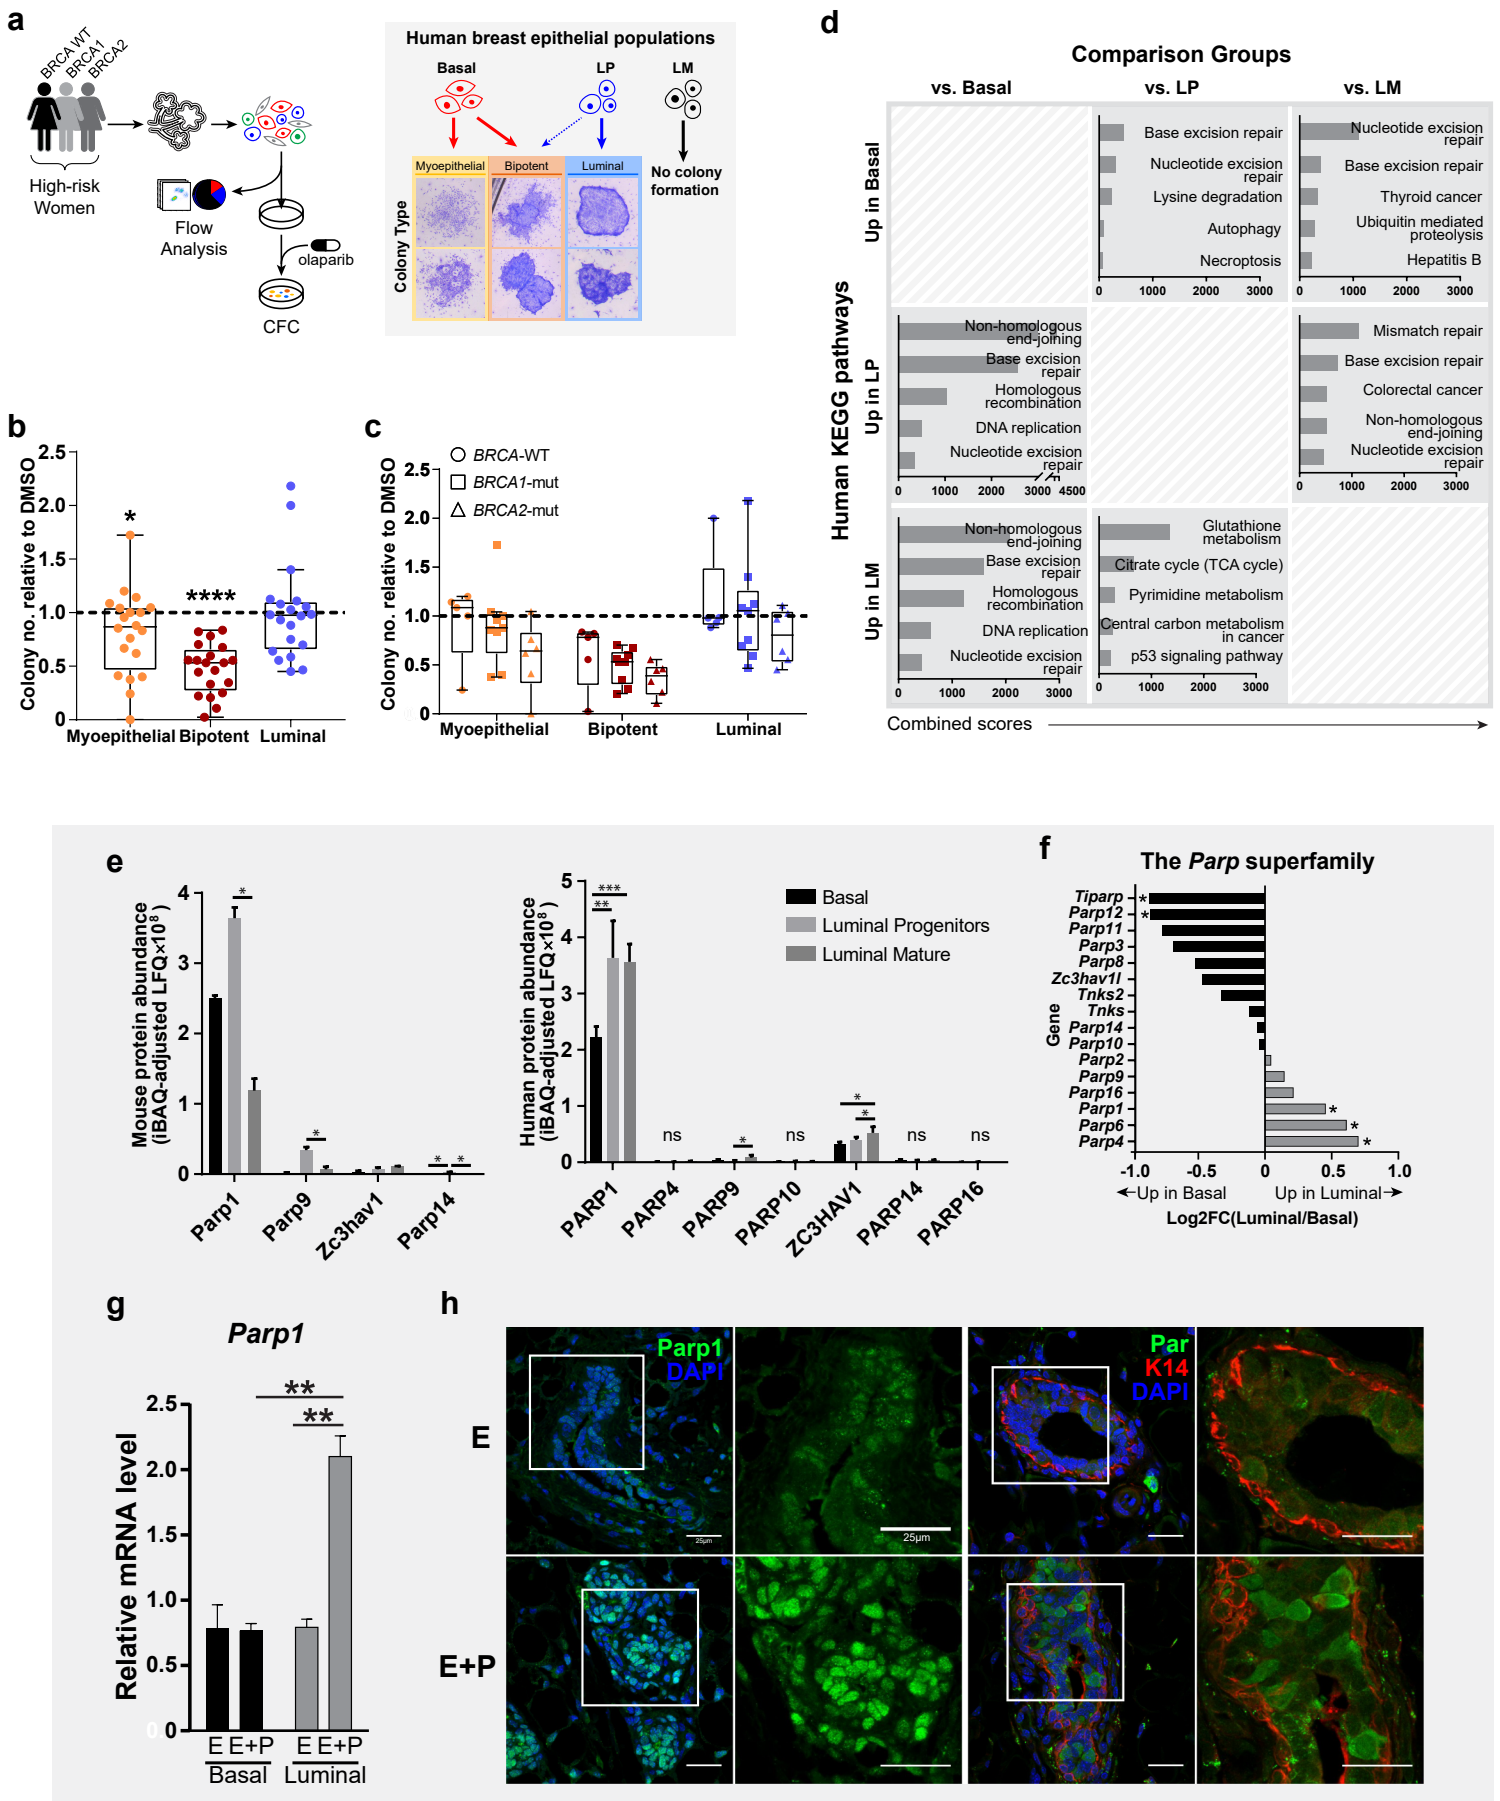

Kim et al. Fig. 6

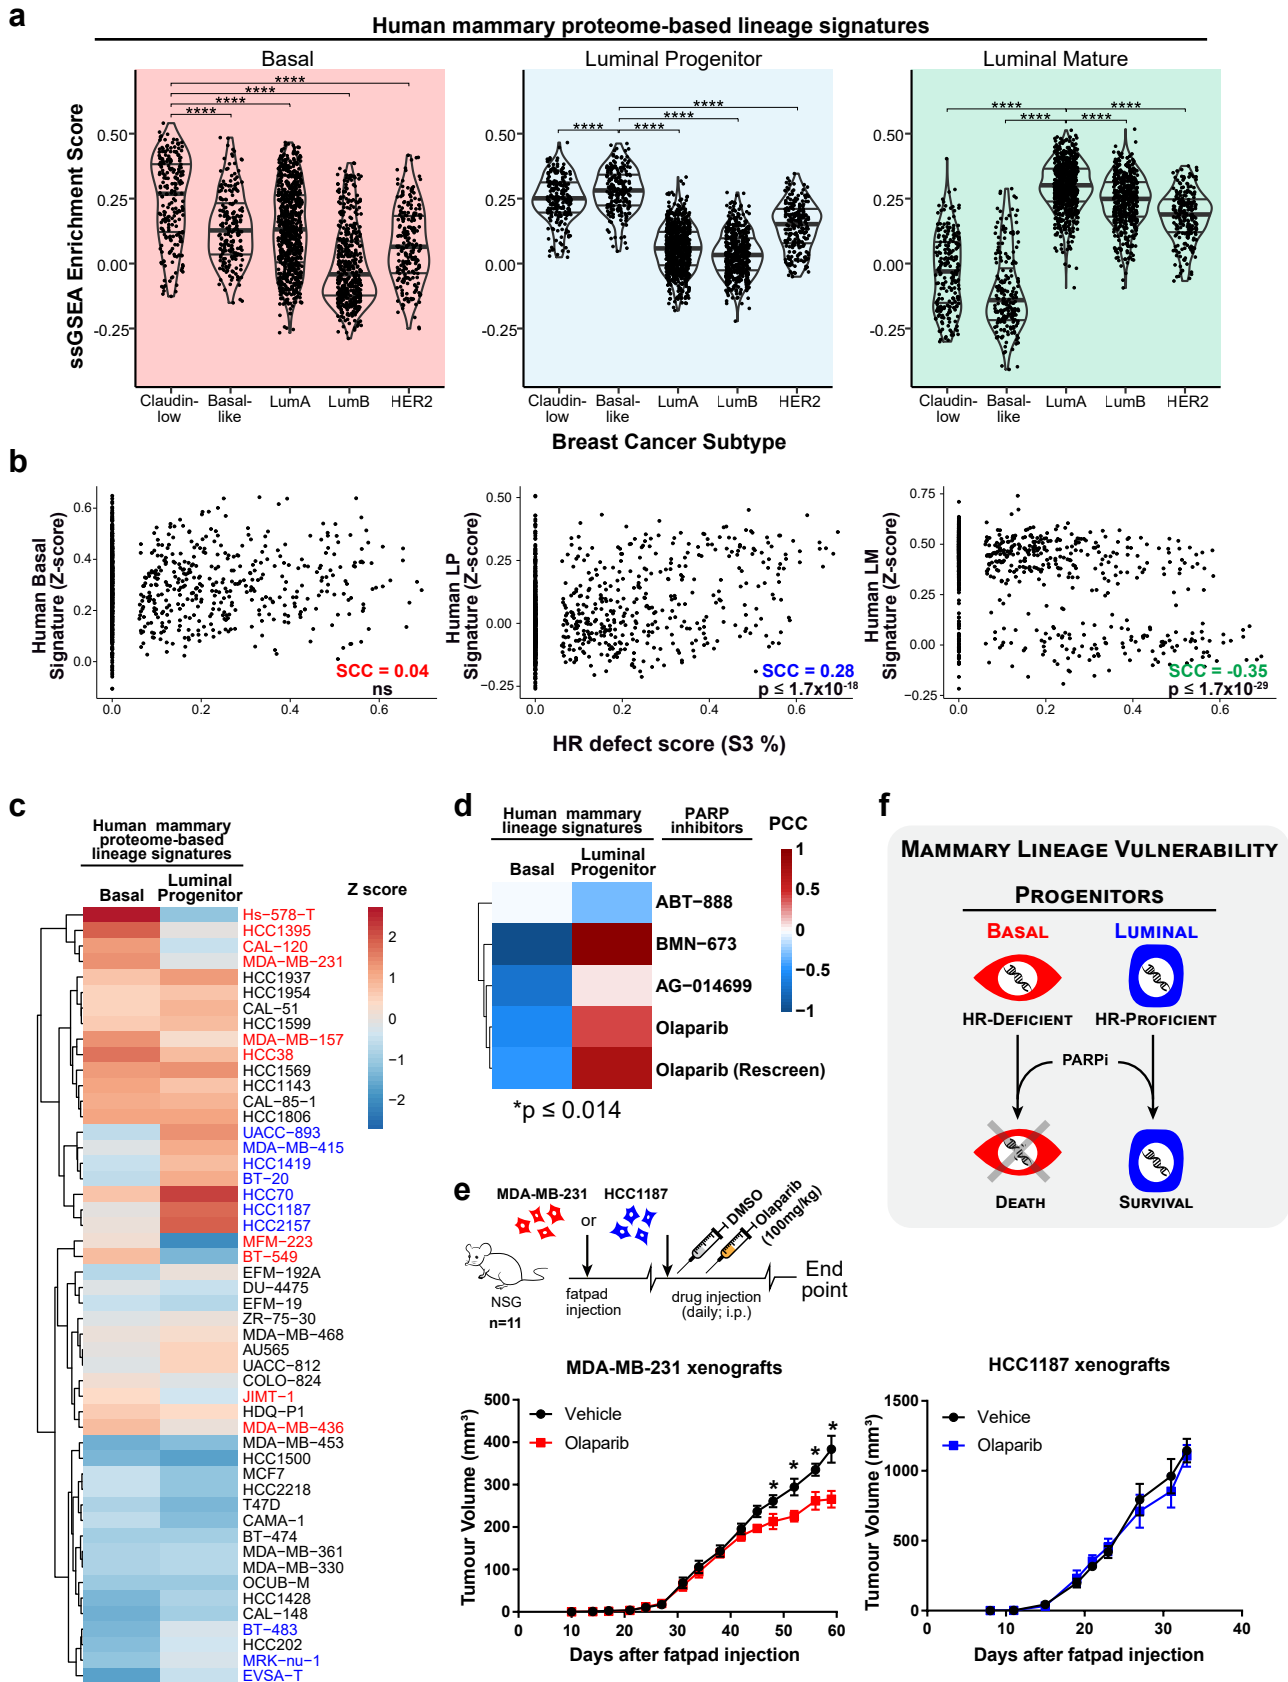

Source: https://www.biorxiv.org/content/10.1101/2021.05.14.444217v1.full.pdf
